# Analysis of the Organic Hydroperoxide Response of *Chromobacterium violaceum* Reveals That OhrR Is a Cys-Based Redox Sensor Regulated by Thioredoxin

José F. da Silva Neto, Caroline C. Negretto, Luis E. S. Netto\*

Departamento de Genética e Biologia Evolutiva, Instituto de Biociências, Universidade de São Paulo, São Paulo, Brazil

## Abstract

Organic hydroperoxides are oxidants generated during bacterial-host interactions. Here, we demonstrate that the peroxidase OhrA and its negative regulator OhrR comprise a major pathway for sensing and detoxifying organic hydroperoxides in the opportunistic pathogen *Chromobacterium violaceum*. Initially, we found that an *ohrA* mutant was hypersensitive to organic hydroperoxides and that it displayed a low efficiency for decomposing these molecules. Expression of *ohrA* and *ohrR* was specifically induced by organic hydroperoxides. These genes were expressed as monocistronic transcripts and also as a bicistronic *ohrR-ohrA* mRNA, generating the abundantly detected *ohrA* mRNA and the barely detected *ohrR* transcript. The bicistronic transcript appears to be processed. OhrR repressed both the *ohrA* and *ohrR* genes by binding directly to inverted repeat sequences within their promoters in a redox-dependent manner. Site-directed mutagenesis of each of the four OhrR cysteine residues indicated that the conserved Cys21 is critical to organic hydroperoxide sensing, whereas Cys126 is required for disulfide bond formation. Taken together, these phenotypic, genetic and biochemical data indicate that the response of *C. violaceum* to organic hydroperoxides is mediated by OhrA and OhrR. Finally, we demonstrated that oxidized OhrR, inactivated by intermolecular disulfide bond formation, is specifically regenerated via thiol-disulfide exchange by thioredoxin (but not other thiol reducing agents such as glutaredoxin, glutathione and lipoamide), providing a physiological reducing system for this thiol-based redox switch.

**Citation:** da Silva Neto JF, Negretto CC, Netto LES (2012) Analysis of the Organic Hydroperoxide Response of *Chromobacterium violaceum* Reveals That OhrR Is a Cys-Based Redox Sensor Regulated by Thioredoxin. PLoS ONE 7(10): e47090. doi:10.1371/journal.pone.0047090

**Editor:** Arun Rishi, Wayne State University, United States of America

**Received:** June 1, 2012; **Accepted:** September 10, 2012; **Published:** October 11, 2012

**Copyright:** © 2012 da Silva Neto et al. This is an open-access article distributed under the terms of the Creative Commons Attribution License, which permits unrestricted use, distribution, and reproduction in any medium, provided the original author and source are credited.

**Funding:** The authors are members of the INCT de Processos Redox em Biomedicina-Redoxoma (FAPESP/CNPq/CAPES) [grant numbers 2008/57721-3 and 2008/573530]. This work was also supported by grants 07/58147-6 from the Fundação de Amparo à Pesquisa do Estado de São Paulo (FAPESP), and a post-doctoral fellowship from CNPq to Jose Freire da Silva Neto. The funders (FAPESP/CNPq/CAPES) had no role in study design, data collection and analysis, decision to publish, or preparation of the manuscript.

**Competing Interests:** Luis E. S. Netto is an academic editor. This does not alter the authors' adherence to all the PLOS ONE policies on sharing data and materials.

\* E-mail: nettoles@ib.usp.br

## Introduction

Reactive oxygen species (ROS), such as superoxide, hydrogen peroxide ( $H_2O_2$ ) and organic hydroperoxides, are generated as by-products of aerobic metabolism and are also important components of plant and animal innate immune systems. Increased levels of these oxidants can damage DNA, proteins and membranes [1]. Lipid peroxidation, for instance, can occur due to the oxidation of polyunsaturated fatty acids by free radicals present on cell membranes or catalyzed by lipoxygenases, enzymes produced as part of the active defense response of plants and animals [2–5]. In addition to affecting membrane fluidity, lipid peroxides are highly toxic because their degradation results in the generation of more reactive by-products, such as acrolein and malondialdehyde (MDA). These short-chain aldehydes are capable of forming adducts with proteins and DNA, thus affecting essential cellular processes [6,7]. Therefore, organic hydroperoxide detoxification is critical for bacterial survival.

The first characterized system for the detoxification of organic hydroperoxides in bacteria was the enzyme alkyl hydroperoxide reductase AhpCF [8], which is composed of two subunits, the thiol-dependent peroxidase AhpC (a member of the peroxiredoxin

family), and AhpF, a flavoenzyme that reduces AhpC, using NAD(P)H reducing equivalents [9]. The AhpCF system is also an important scavenging enzyme for  $H_2O_2$  [10], and accordingly, it is often regulated by OxyR, the master hydrogen peroxide-stress regulator in *E. coli* [1,11].

A second system for organic hydroperoxide scavenging is the Ohr (organic hydroperoxide resistance) protein, initially described in *Xanthomonas campestris* [12]. A series of genetic and expression studies in several bacteria indicate that the gene *ohr* is specifically induced by organic hydroperoxides. Furthermore, *ohr* mutants are hypersensitive to organic hydroperoxides, not being affected by other agents that generate ROS [12–16]. In fact, *in vitro* biochemical studies have demonstrated that Ohr is a Cys-based, thiol-dependent peroxidase able to reduce organic hydroperoxides more effectively than  $H_2O_2$  [17,18]. Ohr has a low similarity to OsmC (osmotically inducible protein), a member of the osmotic stress response in *E. coli* [19]. Despite the fact that both proteins are endowed with a thiol peroxidase activity and share a common structural fold [17,20,21], they display different patterns of regulation, probably reflecting diverse physiological roles. In fact, they are classified as two distinct subfamilies of the OsmC/Ohr family, and both are exclusively present in bacteria [22]. Recently,

our group has shown that the peroxidase activities of both OsmC and Ohr are supported *in vivo* by lipoylated proteins, a previously undescribed enzymatic activity [23].

In many bacteria, the gene for Ohr is in a close vicinity to a gene for OhrR, a redox-sensing repressor of the MarR family. Members of this family act as dimeric proteins and control genes that confer resistance to multiple antibiotics and ROS [11]. In some bacteria, it has been shown that, in the reduced form, OhrR binds to the *ohr* promoter and, thereby, represses its transcription [14,15,16]. Upon oxidative stress stimulated by organic peroxides, OhrR is oxidized and suffers a conformational modification that decreases its affinity for the *ohr* promoter [11]. Indeed, structural data available for the OhrR proteins of *B. subtilis* [24] and *X. campestris* [25] indicate that the oxidation of cysteines leads to a rotation of the OhrR DNA-binding motif WHTH (winged helix-turn-helix) with subsequent DNA dissociation, resulting in the expression of the *ohr* gene. However, there are mechanistic differences among the OhrR proteins from different bacteria. In *Streptomyces coelicolor*, OhrR acts both as a repressor of *ohrA* as well as an activator of *ohrR* expression [15]. According to the mechanisms of redox regulation by organic hydroperoxides, OhrR proteins are classified into two subfamilies: the 1-Cys subfamily, which contains a single conserved cysteine that is best characterized in *B. subtilis*, and the 2-Cys subfamily, which contains the prototypical OhrR of *X. campestris* and contain two redox-active cysteine residues [11].

In *B. subtilis*, the oxidation of the highly conserved Cys15 residue of its 1-Cys OhrR produces a sulfenic acid intermediate [26], which then reacts with low molecular weight thiols, leading to the formation of mixed disulfides [27]. Alternatively, the sulfenic acid can suffer a condensation reaction with a primary amine, giving rise to a cyclic sulfenamide, or can be over-oxidized by other peroxide molecules to sulfinic or sulfonic acids [11,27,28]. Otherwise, the inactivation of the *X. campestris* 2-Cys OhrR repressor involves the formation of a reversible intermolecular disulfide bond between the two subunits of the OhrR dimer, involving the conserved Cys22 and Cys127 residues [11,28,29]. Although the oxidation of 1-Cys and 2-Cys OhrRs has been investigated in some bacteria, currently the identities of biological systems capable of reducing OhrR have not been described. Thiol-dependent regulators known to operate as authentic thiol-based regulatory switches include the hydrogen peroxide activator OxyR, which is deactivated by the glutaredoxin system [30] and the  $\sigma^R$ -RsrA system, whose anti-sigma factor RsrA is reduced by the thioredoxin system [31] and by mycothiol [32].

Because Ohr/OhrR proteins are exclusively present in bacteria and present several unique features, they may represent promising targets for drug development. *Chromobacterium violaceum* is a Gram-negative  $\beta$ -proteobacterium widely distributed in the soil and water of tropical and subtropical areas worldwide, including diverse Brazilian ecosystems [33]. This saprophytic bacterium is also an opportunistic pathogen that infects both humans and animals. Human *C. violaceum* infections are rare but spread rapidly, leading to abscesses in lungs, liver and spleen and a high mortality rate, which is in part due to its resistance to a broad range of antibiotics [34,35]. In addition to these clinical reports, it has been verified that mice with defective phagocyte NADPH oxidase, and thus unable to produce the oxidative burst, were more susceptible to infection by *C. violaceum* and *Burkholderia cepacia* [36]. More recently, the pathogenicity of *C. violaceum* has been studied in model organisms. It has been discovered that a quorum-sensing system contributes to *C. violaceum* virulence in *Caenorhabditis elegans* [37] and that the island 1 type III secretion system is a major virulence factor in the murine model [38].

In the environment or within the host organism, *C. violaceum* is expected to be exposed to oxidative stress conditions. Analysis of the *C. violaceum* genome sequence indicates the presence of many genes related to oxidative stress responses [39,40]. However, the mechanisms employed by *C. violaceum* to resist oxidative insults, including organic hydroperoxide, are largely unknown. In this work, we show that OhrA and its negative regulator OhrR are critical for sensing and degradation of organic hydroperoxides in *C. violaceum*. Indeed, reduced OhrR bound to operator sites on the *ohrA* and *ohrR* promoters. Upon oxidation of a conserved cysteine residue, OhrR was functionally inactivated by intermolecular disulfide bond formation, resulting in a strong derepression of *ohrA* transcription. Remarkably, oxidized OhrR was specifically reduced *in vitro* by the thioredoxin system, among other thiol systems, restoring its DNA-binding activity. These results provide a reversible thiol-based switch mechanism to regulate the response of bacteria to organic hydroperoxide insults.

## Results

### Identification of OhrA and OhrR orthologues in *C. violaceum*

To obtain a complete catalog of Ohr proteins in the *C. violaceum* genome, we performed a search for the OsmC/Ohr family (PF02566) in the Pfam protein database, a comprehensive compendium of protein families [41]. The OsmC/Ohr family is widely distributed among bacteria (5039 protein sequences in 1916 species, according to Pfam version 26.0 November 2011) and contains proteins initially described as belonging to the OsmC and Ohr subfamilies [22] in addition to a third group of uncharacterized proteins represented by YhfA of *E. coli* [42]. Our search identified four *C. violaceum* proteins belonging to the OsmC/Ohr family: two paralogues with a high degree of similarity between them, OhrA (CV0209) and OhrB (CV2493) (58% identity), and two hypothetical proteins (CV2756 and CV1324).

To clarify the relationship among these *C. violaceum* proteins and with other OsmC/Ohr proteins, we performed multiple sequence alignments using the ClustalW algorithm. All aligned proteins contain the two conserved active site cysteines typical of OsmC/Ohr proteins [22]. The phylogenetic tree built from this alignment (Fig. 1A) presents three main branches that fit with the previously described subfamilies, Ohr, OsmC and YhfA [42]. Although a phylogenetic investigation of the Ohr/OsmC proteins was beyond the scope of this work, we could detect significant variation in the number of genes for these proteins per genome and a wide disparity in their distribution after analyzing only six bacterial genomes. Thus, in *C. violaceum*, there are two Ohr proteins (OhrA and OhrB), none in the OsmC branch, one that fits within the YhfA subfamily (CV2756) and one displaying a high divergence in relation to the three subfamilies (CV1324) (Fig. 1A). In several bacteria, *ohr* and *ohrR* are adjacent genes, suggesting that they operate in the same pathway. In the *C. violaceum* genome, next to CV0209 there is a gene encoding for a MarR family regulator (CV0210). Therefore, based on sequence similarity and genome colocalization, it is probable that the adjacent genes CV0209 and CV0210 encode for the OhrA and OhrR proteins, respectively (Fig. 1B).

### OhrA is required for resistance to and the degradation of organic hydroperoxides

To determine the role of OhrA and OhrR in oxidative stress defense, mutant strains with deletions for the *ohrA* and *ohrR* genes were obtained by allelic exchange, and their growth after oxidant exposure was compared to that of the wild-type strain, ATCC

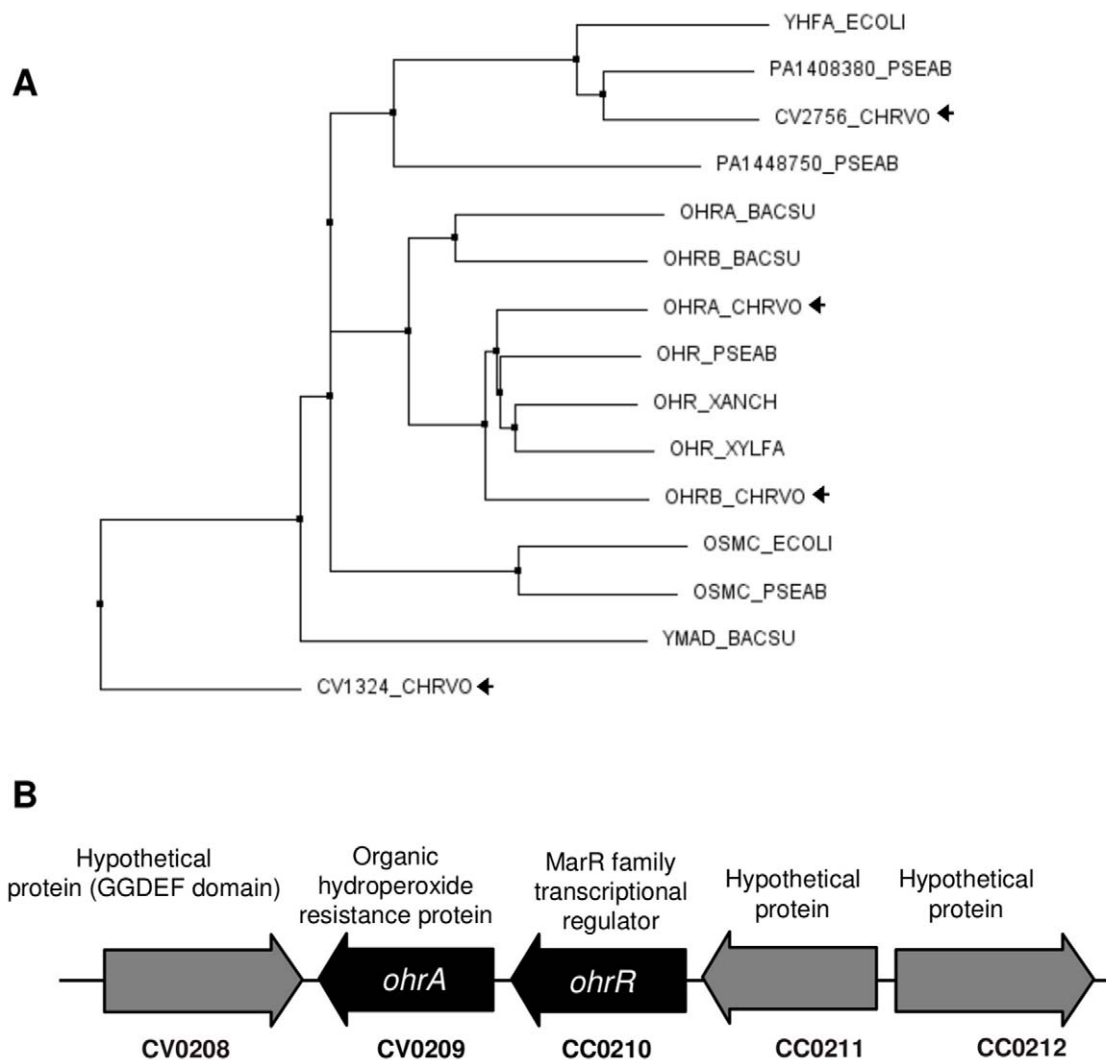

**Figure 1. *Chromobacterium violaceum* possesses four proteins belonging to the OsmC/Ohr family.** (A) Phylogenetic tree of OsmC/Ohr proteins (PF02566) from six selected bacterial genomes. Protein sequences from *Chromobacterium violaceum* (CHRVO), *Pseudomonas aeruginosa* (PSEAE), *Xylella fastidiosa* (XYLFA), *Xanthomonas campestris* pv. *phaseoli* (XANCH), *Bacillus subtilis* (BACSU) and *Escherichia coli* (ECOLI) were aligned using the CLUSTAL W 2.1 program. The tree was obtained by using the neighbor-joining method and Blosum62 from the CLUSTAL W alignment. (B) The schematic depicts the chromosomal region of *C. violaceum* around the *ohrA* and *ohrR* genes.  
doi:10.1371/journal.pone.0047090.g001

12472. The *C. violaceum* *ohrA* deletion mutant was hypersensitive to the organic hydroperoxides *tert*-butyl (tBOOH) and cumene (CuOOH) but not to hydrogen peroxide (Fig. 2A, 2B and 2C). Furthermore, these phenotypes were complemented after providing the *ohrA* gene in *trans* in the plasmid pMR20 (Fig. 2D and 2E). In contrast, the *ohrR* mutant was not sensitive to any of these treatments (data not shown).

To further characterize the relevance of OhrA and OhrR in the response of *C. violaceum* to organic hydroperoxide stress *in vivo*, the peroxide concentration remaining in the culture medium, corresponding to the wild type and mutant strains, was evaluated (Fig. 3). The *ohrA* mutant displayed a markedly decreased capacity to decompose organic hydroperoxides (tBOOH and CuOOH) given that after 25 min the levels of these oxidants remained unaffected, which was similar to the culture not inoculated with bacteria. At the same time, the remaining amount of tBOOH and CuOOH was 50% for the wild type strain. The *ohrR* mutant, in turn, was a more efficient consumer of tBOOH and CuOOH, requiring only 10 min

to degrade all the added hydroperoxides (Fig. 3A and 3B). These profiles of organic hydroperoxide consumption suggest that OhrR acts as a negative regulator of *ohrA*. Thus, the *ohrR* mutant cells are probably devoid of repressive regulatory mechanisms, presenting high levels of OhrA. In contrast, both mutant strains degraded  $H_2O_2$  similar to the wild type strain, indicating, as expected, that OhrA and OhrR do not participate in the response of *C. violaceum* to this oxidant (Fig. 3C). Taken together, these physiological and biochemical data indicated that OhrA/OhrR is the main pathway for *C. violaceum* to specifically degrade organic hydroperoxides. In contrast to the specificity of OhrA, it has been shown that the pigment violacein produced by *C. violaceum* has a broad antioxidant activity *in vitro* [43].

### Regulation of the *ohrA* and *ohrR* genes in response to stresses

To further evaluate the physiological roles of OhrA/OhrR in the response of *C. violaceum* to organic hydroperoxide insults, the

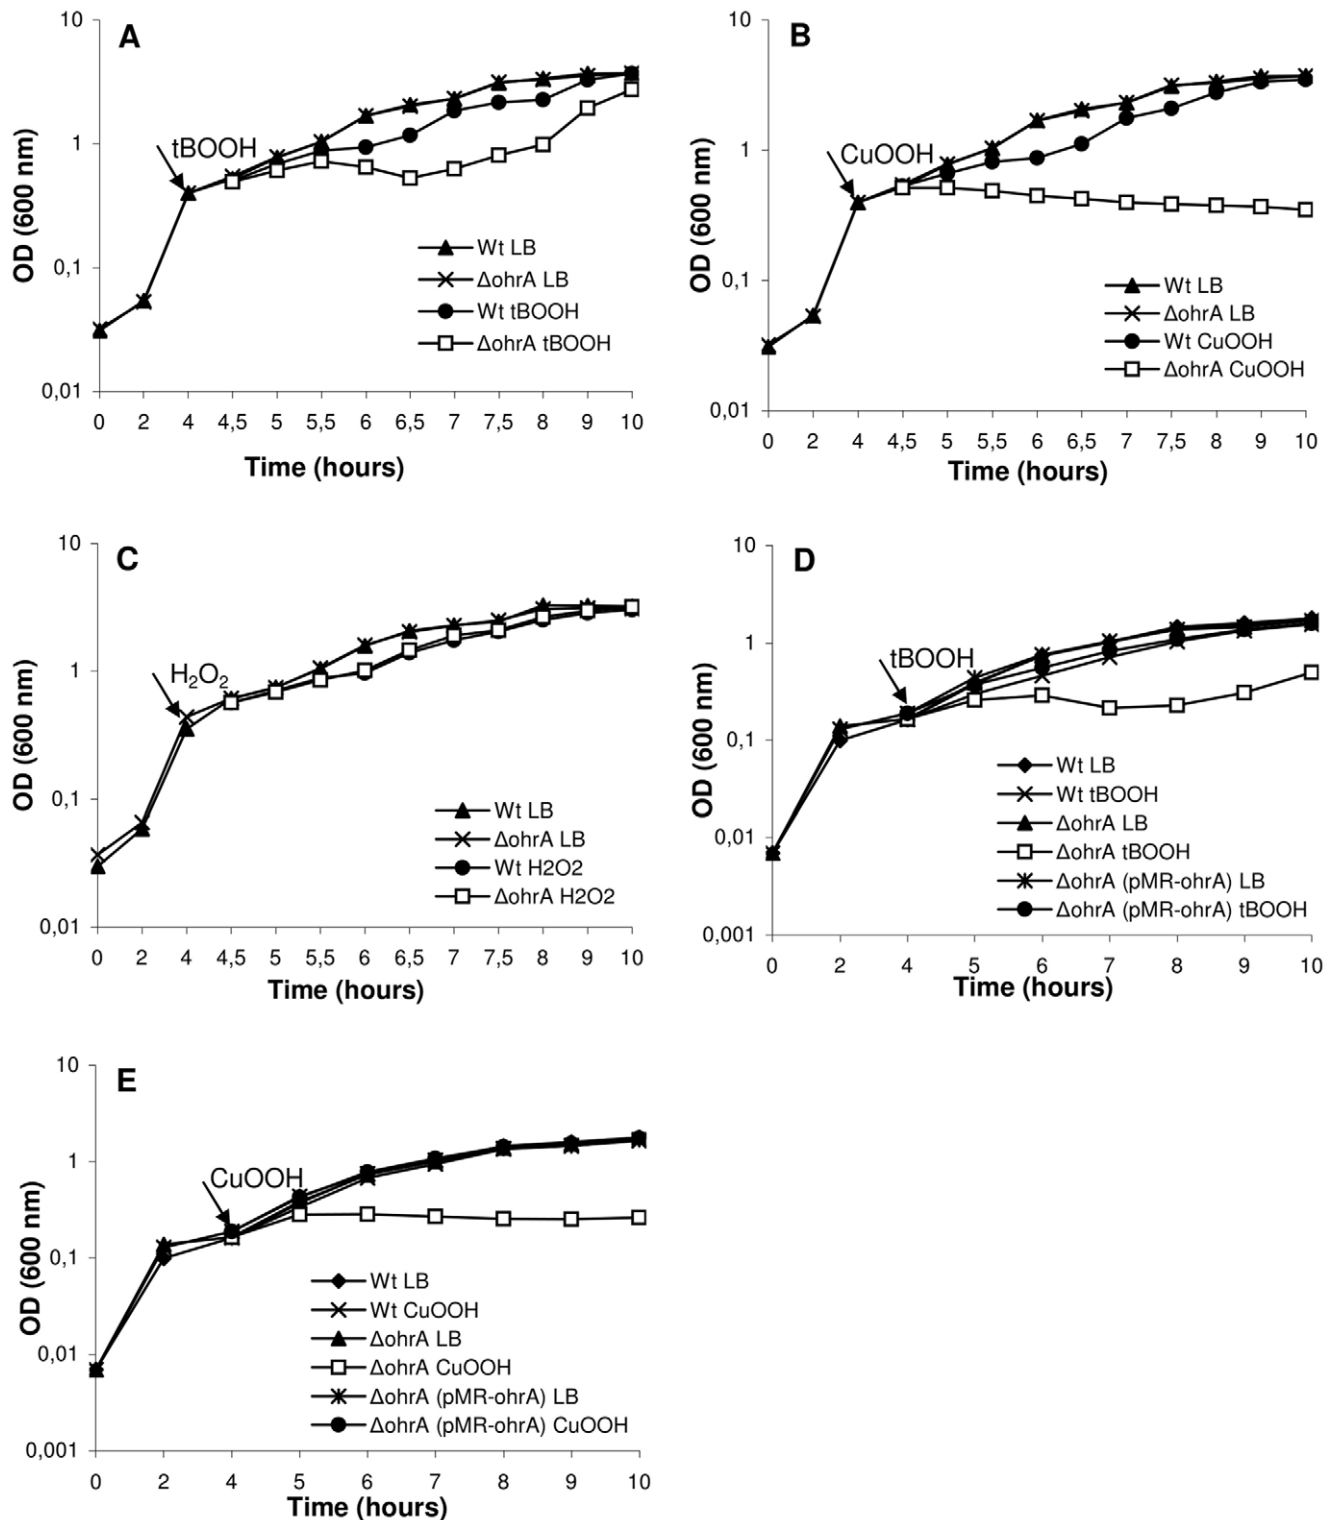

**Figure 2. Effect of peroxides on the growth of the wild type and  $\Delta ohrA$  mutant strains.** Cultures grown in LB medium for 4 hours (to an OD at 600 nm of 0.4) were divided and either untreated or treated (indicated by arrow) with 140  $\mu$ M tBOOH (**A**), 60  $\mu$ M CuOOH (**B**) or 75  $\mu$ M H<sub>2</sub>O<sub>2</sub> (**C**). For complementation assays, the indicated strains, harboring the pMR20 vector, were grown in LB medium plus tetracycline for 4 hours, and the cultures were either untreated or treated with 120  $\mu$ M tBOOH (**D**) or 40  $\mu$ M CuOOH (**E**). The figure shows a representative experiment of two independent repetitions.

doi:10.1371/journal.pone.0047090.g002

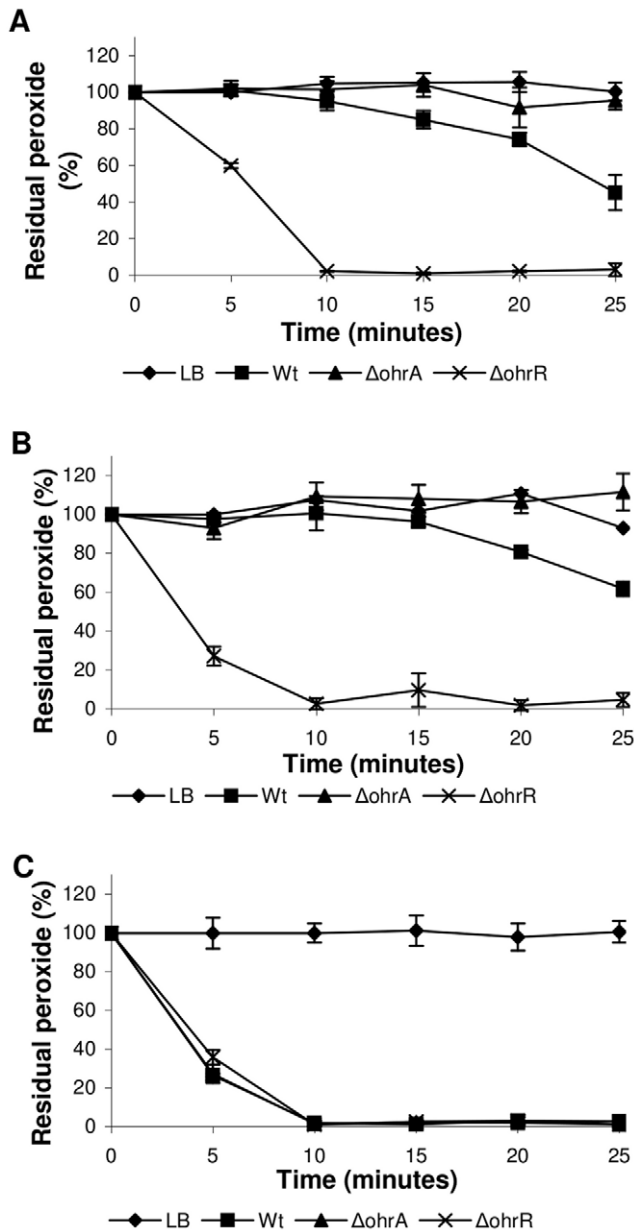

**Figure 3. Degradation of peroxides by the *C. violaceum* ATCC 12472 and  $\Delta ohrA$  and  $\Delta ohrR$  mutant strains.** Cultures grown in LB medium to an OD at 600 nm of 0.7 were divided and either treated with 300  $\mu$ M tBOOH (A), 200  $\mu$ M CuOOH (B) or 500  $\mu$ M H<sub>2</sub>O<sub>2</sub> (C). The level of residual peroxides remaining in the culture medium was determined at 5-min intervals using a xylenol orange assay.  
doi:10.1371/journal.pone.0047090.g003

expression profiles of the *ohrA*, *ohrB* and *ohrR* genes were investigated by Northern blot using exponentially growing cells treated with several stressful conditions (Fig. 4). We found that *ohrA* was markedly induced by the synthetic organic hydroperoxides CuOOH and tBOOH but was not affected by H<sub>2</sub>O<sub>2</sub>, ethanol or NaCl treatments (Fig. 4A). Similarly, the *ohrR* gene displayed organic hydroperoxide-specific expression (tBOOH and CuOOH), but the induction ratios were lower than those observed for the *ohrA* gene. When the same RNA preparations were probed with an *ohrB*-specific probe, no transcript was detected in any of the examined conditions (Fig. 4A). The induction of *ohrA* and *ohrR*

expression by organic hydroperoxides has been described before [14–16], whereas *ohrB* induction by ethanol and NaCl, observed in other bacteria [13,15], was not verified here in *C. violaceum*.

To further examine the effect of more complex organic hydroperoxides in *ohrA* expression, Northern blot analyses were performed using RNA samples from wild type cells exposed to linoleic acid hydroperoxide and oleic acid hydroperoxide (Fig. 4B). Even when used at lower concentrations (50  $\mu$ M), these lipid hydroperoxides were more potent inducers of *ohrA* expression than tBOOH and CuOOH (Fig. 4A and 4B). Under these conditions, a longer transcript of approximately 1.1 kb in length, which is equivalent to the expected size for bicistronic *ohrR-ohrA* mRNA, was also detected in addition to the 0.5 kb monocistronic *ohrA* transcript. The longer bicistronic *ohrR-ohrA* transcripts were less abundant than the shorter monocistronic transcripts of *ohrA* (Fig. 4B). In *X. campestris* and *P. aeruginosa*, where the *ohrR* and *ohrA* genes are also oriented in a head-to-tail manner, as observed in *C. violaceum* (Fig. 1B), similar transcriptional organizations were also observed [16,44]. Then, we examined the time course induction of *ohrA* and *ohrR*. Both genes displayed transient induction because their mRNA levels were elevated 10 min after cell treatment with 100  $\mu$ M tBOOH, but these levels decreased, reaching the prestimulus condition in a few minutes (for *ohrR*) and in about one hour (for *ohrA*) after the treatment (Fig. 4C).

Next, primer extension experiments were performed on RNA samples from uninduced (UN) and linoleic acid hydroperoxide (LaOOH)-induced samples to locate the *ohrR* and *ohrA* transcription start sites (Fig. 5). When using a specific primer to *ohrR*, the results showed that the single primer extension product detected (Fig. 5A) corresponded to the *ohrR* transcription start site (+1), located at the A residue coinciding with the translation initiation codon (ATG) of *ohrR*. The putative *ohrR* promoter elements were predicted (TTGCAA- 17 nucleotides -TATTAT) and match quite well with the consensus sequence recognized by the primary *E. coli*  $\sigma^{70}$  factor (Fig. 5C). Based on a multiple sequence alignment, we reannotated the *OhrR* translation initiation codon (an ATG codon instead of the previously annotated TTG codon, Fig. 5C). Although, as a consequence, an *ohrR* leaderless mRNA is now predicted, several lines of evidence support this assumption: (i) The amino terminal region of the deduced *OhrR* protein matches with that of other *OhrR* proteins, (ii) the position of the conserved residues Cys21 and Cys126 maintain a good agreement with the 2-Cys *OhrR* subfamily and (iii) in other bacteria, such as *X. campestris* and *S. coelicolor*, *ohrR* transcription also initiates at the A residue of the ATG translation initiation codon [15,45].

When a primer extension analysis was performed with the *ohrA* gene, several primer extension products, strongly induced by LaOOH, were detected (Fig. 5B). These products appear to be specific to *ohrA* because they were detected under diverse experimental conditions, changing annealing temperatures and RNA primer ratios (data not shown). The primer extension products mapped to the intergenic region between *ohrR* and *ohrA* and also within the *ohrR* gene (underlined nucleotides, Fig. 5D). The *ohrA* transcription start site (+1) is probably the T residue located 36 nucleotides upstream from the translation initiation codon because its position is consistent with transcription being driven from the  $\sigma^{70}$  type promoter (TTGATA- 16 nucleotides -TTAAAT) identified in the sequence. The other products could be alternative transcription start sites or, more probably, correspond to several 5' ends of the *ohrA* mRNA, processed from the bicistronic *ohrR-ohrA* mRNA detected by Northern blot (Fig. 4B and 4C), similar to what has been observed with *X. campestris* [44].

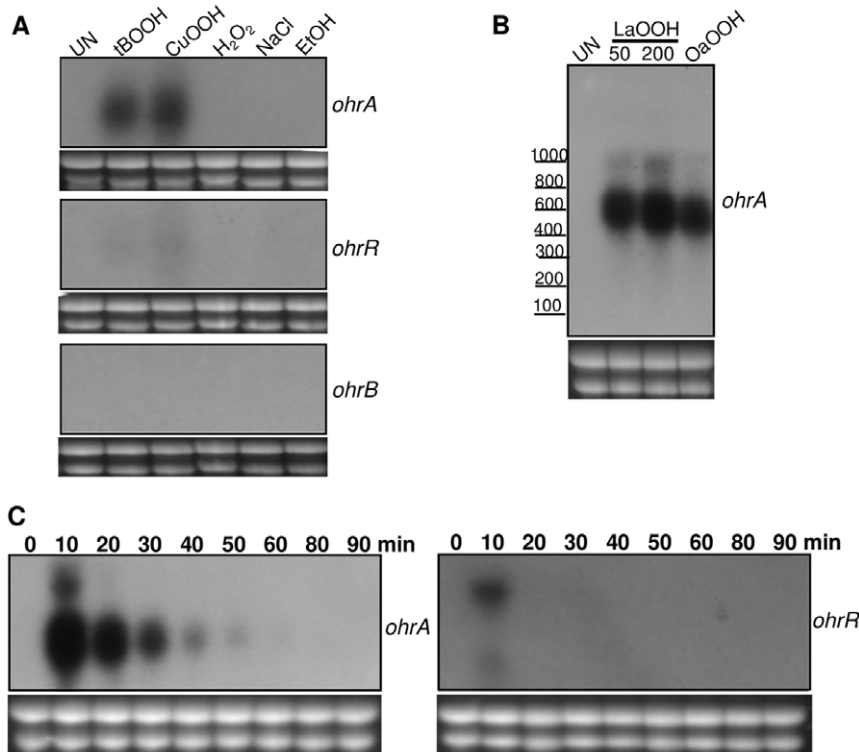

**Figure 4. Northern blot analysis of the *C. violaceum* *ohr* genes.** (A) Total RNA was extracted from exponential-phase cultures of wild type ATCC 12472 strain under uninduced conditions (UN) and after exposure to 200 μM tBOOH, 200 μM CuOOH, 200 μM H<sub>2</sub>O<sub>2</sub>, 3% NaCl and 4% ethanol (EtOH) for 15 min. RNA was separated on 1.5% agarose gel, transferred to a nylon membrane and hybridized with radiolabeled probes specific to *ohrA*, *ohrR* or *ohrB*. (B) *ohrA* induction by lipid hydroperoxides. Wild type cells were exposed to 50 μM and 200 μM linoleic acid hydroperoxide (LaOOH) or to 50 μM oleic acid hydroperoxide (OaOOH) for 15 min prior to Northern blot. (C) Time course of *ohrA* and *ohrR* induction. RNA samples from wild type cells untreated (0) or treated with 100 μM tBOOH for the indicated times (0 to 90 min) were hybridized with probes specific to *ohrA* or *ohrR*. Ethidium bromide staining of rRNA was used as a loading control and is shown below each Northern blot experiment. The sizes of the bands were estimated by ethidium bromide staining of the molecular weight marker Low Range RNA Ladder Riboruler (Fermentas). doi:10.1371/journal.pone.0047090.g004

### OhrR binds to *ohrA* and *ohrR* promoters and its binding is inhibited by peroxides

The direct interaction of OhrR with the *ohrA* and *ohrR* promoters was tested by electrophoretic mobility shift assays (EMSA) using recombinant *C. violaceum* OhrR and labeled DNA fragments. The addition of various concentrations of purified OhrR resulted in a slower migration of the probes in a dose-dependent manner, indicating that OhrR directly binds to the *ohrA* and *ohrR* promoters *in vitro* (Fig. 6A and 6B). Competition assays using specific and non-specific unlabeled DNA confirmed the specificity of OhrR binding (Fig. 6A and 6B). In contrast, the OhrR protein did not bind to the promoter region of *ohrB* as well as to an unspecific probe even at a 1000 nM concentration. Nonspecific complexes between OhrR and DNA began to form at concentrations above 2500 nM (Fig. S1).

The EMSA assay was also used to test the *in vitro* effects of oxidants on the ability of OhrR to bind to the *ohrA* and *ohrR* promoters. The addition of tBOOH, CuOOH and H<sub>2</sub>O<sub>2</sub> to the binding reaction lead to the loss of OhrR binding to its target sites, although a higher concentration of H<sub>2</sub>O<sub>2</sub> was required for OhrR inactivation. Binding activity was recovered upon the addition of the reducing agent dithiothreitol (DTT) (Fig. 6C and 6D). These results indicate that OhrR oxidation renders it unable to bind to the *ohrA* and *ohrR* promoters *in vitro*, but the oxidized protein could be re-reduced again by DTT (100 mM), recovering its DNA-binding activity. Similarly, it has been reported in *B. subtilis* and *P.*

*aeruginosa* that OhrR activity was abolished after exposure to several oxidants *in vitro* [26,46].

### Mapping of OhrR-binding sites within the *ohrA* and *ohrR* promoters

To determine the precise localization of the OhrR-binding sites within the *ohrA* and *ohrR* promoter regions, we performed DNase I footprinting experiments. The region protected from DNase I digestion on the *ohrA* promoter fragment spans from nucleotides +7 to −34, with respect to the *ohrA* transcriptional start site (Fig. 7A). On the *ohrR* promoter fragment, OhrR binding resulted in an area of protection extending from nucleotides −8 to −50, relative to the *ohrR* transcription start site (Fig. 7B). As shown in Fig. 5C and 5D, the OhrR-binding sites overlap to the −10 and −35 elements of the *ohrR* and *ohrA* promoters, an arrangement consistent with the repressor function of OhrR. A comparison of the two protected regions allowed for the identification of an identical 12-nucleotide sequence (ATAGTGCACATAT), which is a perfect inverted repeat (Fig. 5C and 5D). Although this sequence could be the operator site of OhrR, other imperfect inverted repeat sequences were also detected (CTATT-A-AATAG for OhrA and CAATT-A-AATAG for OhrR) that share more similarity with the putative OhrR binding sequences of other bacteria, including the core sequence AATT-N-AATT [14–16,26,45]. Taken together, the gel shift and DNase I footprinting results demonstrate that reduced OhrR binds with a similar

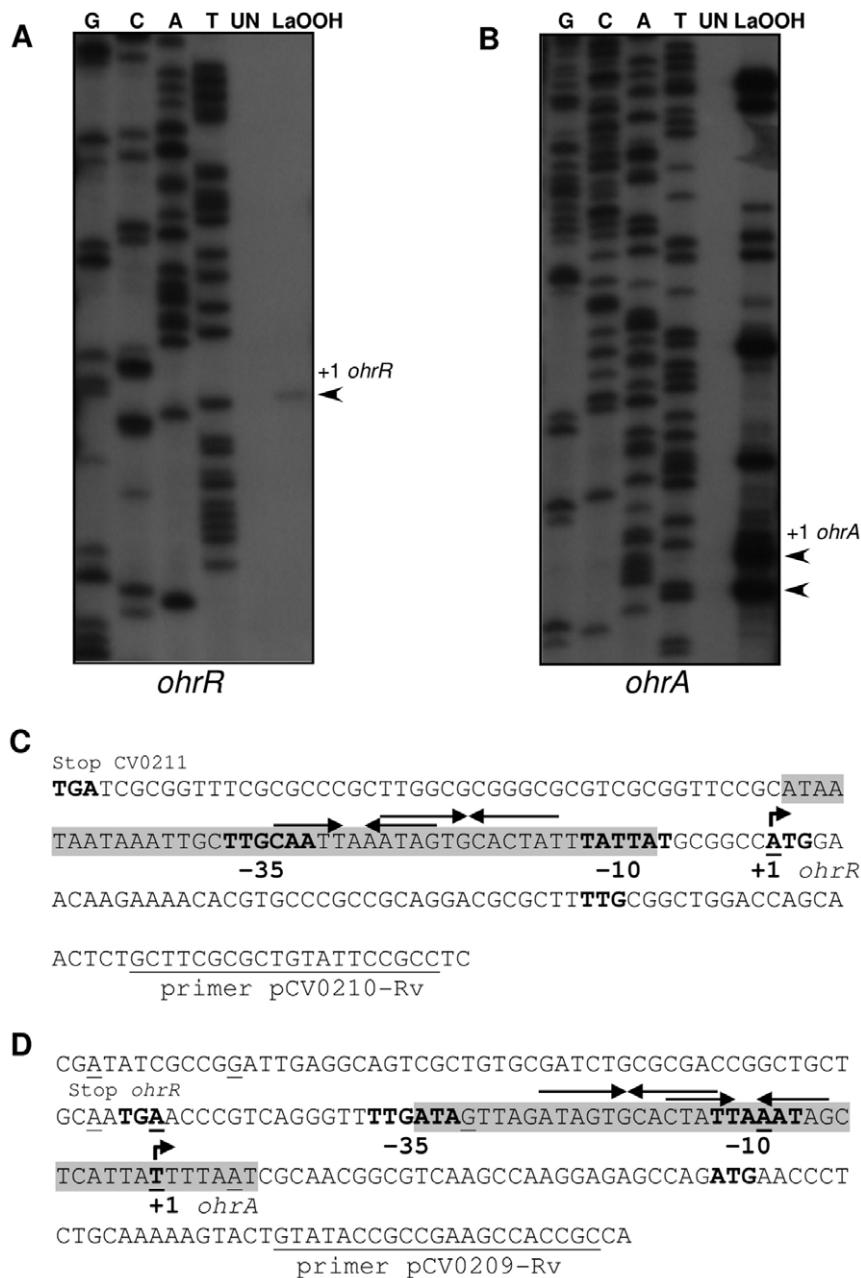

**Figure 5. Mapping transcription start sites for *ohrR* and *ohrA*.** (A and B) Primer extension analysis of *ohrR* (A) and *ohrA* (B) using RNA extracted from *C. violaceum* cultures either untreated (UN) or treated with 200  $\mu$ M linoleic acid hydroperoxide (LaOOH) for 15 min. The Sanger sequencing ladders (G, C, A, T) were generated using the same primers as those used for the primer extension. (C and D) Sequences of the *ohrR* (C) and *ohrA* (D) promoters. The putative  $-10$  and  $-35$  promoter elements, the transcription start sites (+1, bent arrows), the stop codons, and the putative *ohrR* and *ohrA* translation initiation codons (ATG) are shown in bold. The locations of the multiple primer extension products observed for *ohrA* are indicated in the *ohrA* promoter sequence (underlined nucleotides). The DNase I-protected regions for OhrR binding are shaded, and the inverted repeat motifs are indicated by arrows. The primers used in primer extension assays are indicated.

doi:10.1371/journal.pone.0047090.g005

affinity to specific operator sites on the *ohrA* and *ohrR* promoters and also reinforces the finding that *ohrA* and *ohrR* have distinct transcription start sites (Fig. 5).

### Sensing of organic hydroperoxides by OhrR requires the conserved Cys21 residue

When considering our reannotation, the OhrR from *C. violaceum* contains four cysteines, including the fully conserved residue at position 21 (Cys21) and the conserved residue at position 126

(Cys126), which are typical of OhrR proteins belonging to the 2-Cys subfamily [11]. To determine whether these cysteine residues play a role in redox sensing *in vitro*, we generated OhrR C7S, C21S, C126S and C143S site-directed mutant proteins. All recombinant proteins were expressed, purified and investigated through EMSA assays with labeled probes corresponding to the *ohrA* and *ohrR* promoters (Fig. 8). Under reducing conditions, the wild type and four OhrR mutant proteins were able to bind to both DNA probes. The addition of the oxidant tBOOH abolished

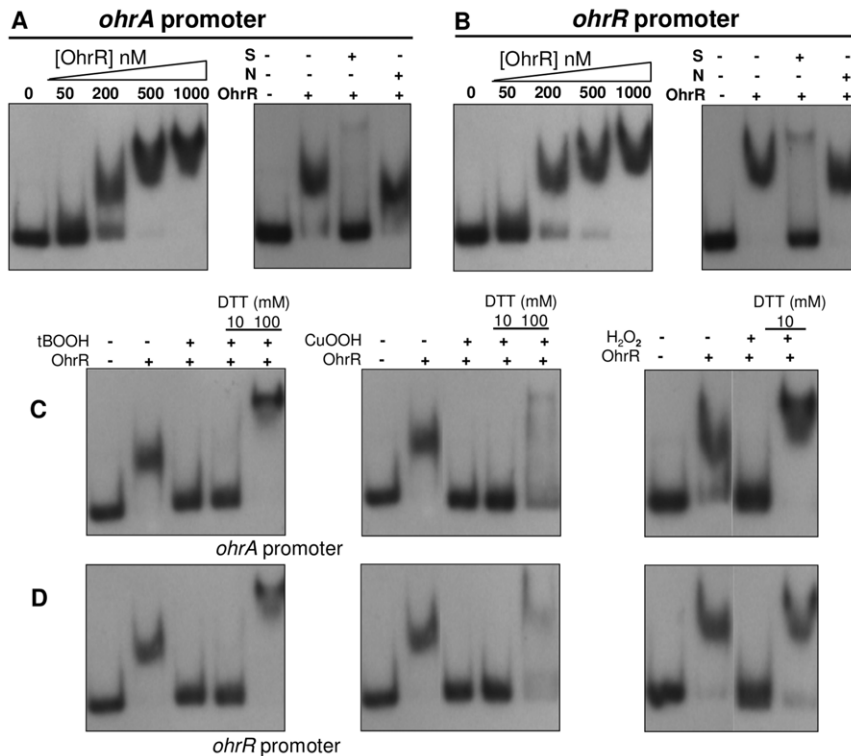

**Figure 6. Interaction of OhrR with the promoter of *ohrA* and *ohrR*, as determined by EMSA.** Labeled probes containing the promoter region of *ohrA* (A) and *ohrR* (B) were incubated with increasing concentrations of purified OhrR protein, as indicated, and the mixture was separated in a polyacrylamide non-denaturing gel. Competition assays (right panels) using 250 nM OhrR were performed in the presence of 30-fold excess of unlabeled fragments of the same region (S) or the *ohrR* coding region (N) as competitors. (C and D) Effects of oxidants and DTT on OhrR binding. EMSA assays using OhrR with the *ohrA* promoter (C) or *ohrR* promoter (D). <sup>32</sup>P-labeled probes were incubated with 250 nM purified OhrR. Either 0.3 mM *tert*-butyl hydroperoxide (tBOOH), 0.3 mM cumene hydroperoxide (CuOOH) or 1 mM H<sub>2</sub>O<sub>2</sub> was added to the binding reaction and incubated for 10 min at 25°C. When indicated, DTT was then added into the reactions, and incubation continued at 25°C for 15 min.

the binding activity of the OhrR wild type, C7S, C126S and C143S proteins. The capacity of these four proteins to bind DNA was recovered upon the addition of DTT, although for the C126S protein this recovery was only partially achieved. However, the DNA-binding activity of the C21S mutant protein was not affected by the tBOOH and DTT treatments (Fig. 8). These data indicate that the conserved Cys21 residue is required for OhrR to sense organic hydroperoxide *in vitro*.

To evaluate the relevance of the four OhrR cysteine residues *in vivo*, after site-directed mutagenesis, the mutated OhrR genes were cloned into the expression vector pMR20. Then, the empty vector and the constructs pMR-*ohr*, pMR-C7S, pMR-C21S, pMR-C126S and pMR-C143S were introduced into the *ohrR* mutant strain by conjugation. The wild type strain, ATCC 12472, and the *ohrR* mutant complemented with these different OhrR variants were grown under uninduced and CuOOH-induced conditions, and their levels of *ohrA* mRNA were measured by Northern blot (Fig. 9A).

As expected, *ohrA* expression was induced by CuOOH in the wild type strain. High levels of the *ohrA* mRNA were detected in the *ohrR* mutant regardless of whether or not CuOOH was present, indicating that OhrR acts as a transcriptional repressor of *ohrA* expression (Fig. 9A). The capacity of the diverse OhrR variants to function as repressors or sensors in response to organic peroxide was evaluated in the *ohrR* mutant background. In the uninduced condition, the proteins C7S, C21S, C126S and C143S allowed for the complementation of the *ohrR* mutant strain because they were able to repress *ohrA* expression similar to the wild type

OhrR, indicating that the cysteines have no role in the binding of OhrR to the *ohrA* promoter (Fig. 9A). Otherwise, upon exposure to CuOOH, only the OhrR wild type, C7S, C143S and C126S (in this case only partially) allowed for *ohrA* derepression, whereas cells expressing the C21S protein were insensitive to CuOOH treatment. These results indicate that Cys21 is also critical for organic hydroperoxide sensing by OhrR *in vivo*.

Extending this rationale to enzymatic activity, we performed peroxide consumption assays using the same bacterial strains to test the ability of the OhrR mutant proteins to complement the *ohrR* mutant strain (Fig. 9B). As expected, the *ohrR* mutant degraded CuOOH more efficiently than the wild type strain, as previously verified (Fig. 3 versus Fig. 9B). The *ohrR* mutant strains complemented with the C7S, C126S, C143S and wild type OhrR degraded CuOOH similarly to wild type strain (Fig. 9B). However, when the complementation was performed using the C21S protein, the resultant strain displayed a hydroperoxide degradation profile comparable to that verified for the *ohrA* mutant strain (Fig. 3 versus Fig. 9B). This result supports the notion that the C21S protein no longer responds to oxidants and persists bound to the *ohrA* promoter even in the presence of the organic hydroperoxide.

### OhrR forms intermolecular disulfide bonds upon oxidation

To further investigate the mechanism by which the *C. violaceum* OhrR protein is oxidized, we performed a nonreducing SDS-

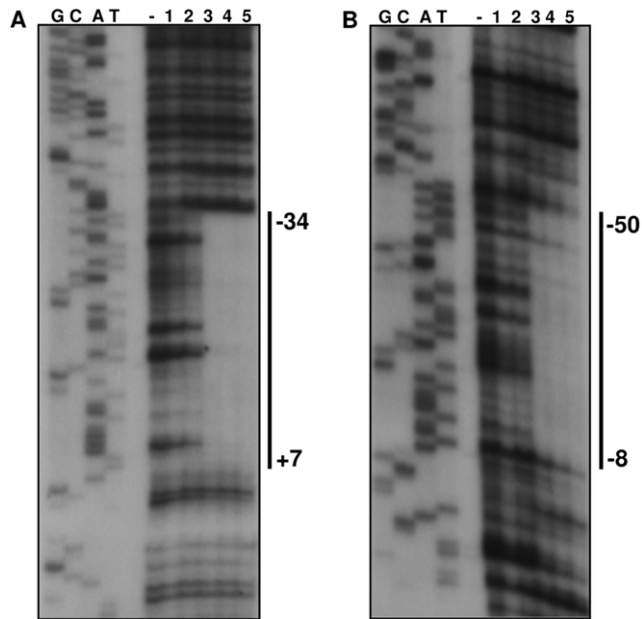

**Figure 7. Mapping of OhrR-binding sites on the *ohrA* and *ohrR* promoters.** DNase I footprinting analyses were performed using probes covering the *ohrA* (A) and *ohrR* (B) promoter regions and increasing concentrations of purified OhrR protein (10, 50, 250, 500 and 1000 nM, lanes 1 to 5). The minus sign (–) represents the probe fragments treated with DNase I in the absence of OhrR. The regions protected by OhrR are indicated by a solid line and numbered according to transcription start sites (+1). The samples were run in parallel with the sequencing ladders (G, C, A, T), which were generated using the promoter fragments themselves as a template.  
doi:10.1371/journal.pone.0047090.g007

PAGE analysis using purified OhrR variants (Fig. 10). When the wild type OhrR containing all four cysteine residues was reduced by DTT treatment, it migrated as a monomer of approximately 20 kDa (the calculated molecular mass of the His-OhrR is 20.87 kDa). After oxidation by CuOOH, most of the protein was converted to covalent dimers (40 kDa). This dimerization upon cumene oxidation was also observed for the C7S and C143S mutant proteins, suggesting that Cys7 and Cys143 have no role in dimer formation. Conversely, the C21S and C126S proteins remained predominantly as monomers even under CuOOH oxidation (Fig. 10). These results indicate that Cys21 and Cys126 form an intermolecular disulfide bond when OhrR is oxidized by cumene, similar to what has been observed with *X. campestris* [29].

#### OhrR is specifically reduced by the thioredoxin system *in vitro*

Taking into account that only the reduced form of OhrR binds DNA and that the oxidized protein is re-reduced by DTT treatment (Fig. 6), we monitored the redox dependent ability of OhrR to bind DNA by EMSA assays, replacing DTT with several thiol reductants in the binding buffer (Fig. 11). When oxidized OhrR (ox) was treated with increasing concentrations of several low molecular weight (LMW) thiols, besides DTT (1–10 mM), only  $\beta$ -mercaptoethanol ( $\beta$ ME) was effectively able to reduce OhrR, but at higher concentrations (100 mM). Both DTT and  $\beta$ ME are synthetic thiols. The biological low molecular weight thiols glutathione (GSH) and dihydrolipoic acid (DHLA) failed to reduce OhrR because no OhrR binding to the *ohrA* promoter probe was observed (Fig. 11A).

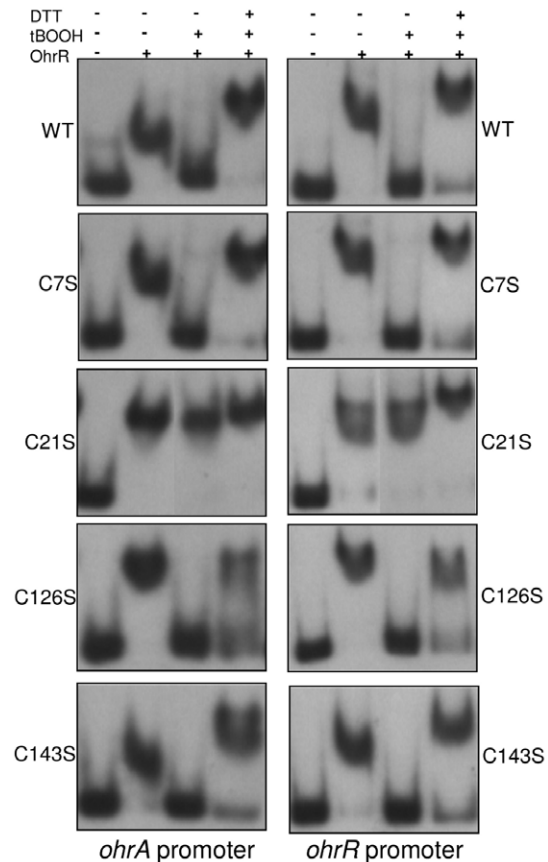

**Figure 8. Effect of OhrR cysteine mutations on peroxide sensing *in vitro*.** EMSA assays were performed using the labeled probes (*ohrA* or *ohrR* promoters) incubated with 250 nM OhrR WT, OhrR C7S, OhrR C21S, OhrR C126S and OhrR C143S purified proteins. When indicated, 0.5 mM *tert*-butyl hydroperoxide (tBOOH) or 0.5 mM tBOOH plus 100 mM DTT were added in the binding reactions.  
doi:10.1371/journal.pone.0047090.g008

Thus, to investigate whether OhrR could be regenerated by enzymatic systems, we reconstituted the components of three important biological reducing pathways (the glutaredoxin, thioredoxin and lipoamide systems) *in vitro* using purified heterologous recombinant proteins (Fig. 11B–F). All three reducing systems presented disulfide reductase activity, as confirmed by DTNB assays (Fig. S2). However, when oxidized OhrR was incubated with glutaredoxin 3 from *Xylella fastidiosa* in the presence of NADPH, glutathione reductase and glutathione, no OhrR binding was observed (Fig. 11B). Similarly, neither the lipoylated enzyme LpdA from *X. fastidiosa* (Fig. 11C) nor lipoamide reduced by dihydrolipoamide dehydrogenase (Lpd) (Fig. 11D) provoked recovery of the OhrR-binding activity. On the other hand, OhrR reduction by DTT (0.5 mM) was stimulated by thioredoxin (TrxA) from *E. coli* (Fig. 11E, lane 5), suggesting that the thioredoxin system could be an enzymatic reductant for OhrR. In fact, when the complete thioredoxin system (TrxA in the presence of TrxB and NADPH) was used to replace DTT (Fig. 11F), we verified the recovery of the OhrR-binding ability to the *ohrA* promoter (Fig. 11F, lanes 5–9). These biochemical results indicate that the *C. violaceum* OhrR is specifically reduced by thioredoxin, among other biological reducing systems (glutaredoxin and lipoamide).

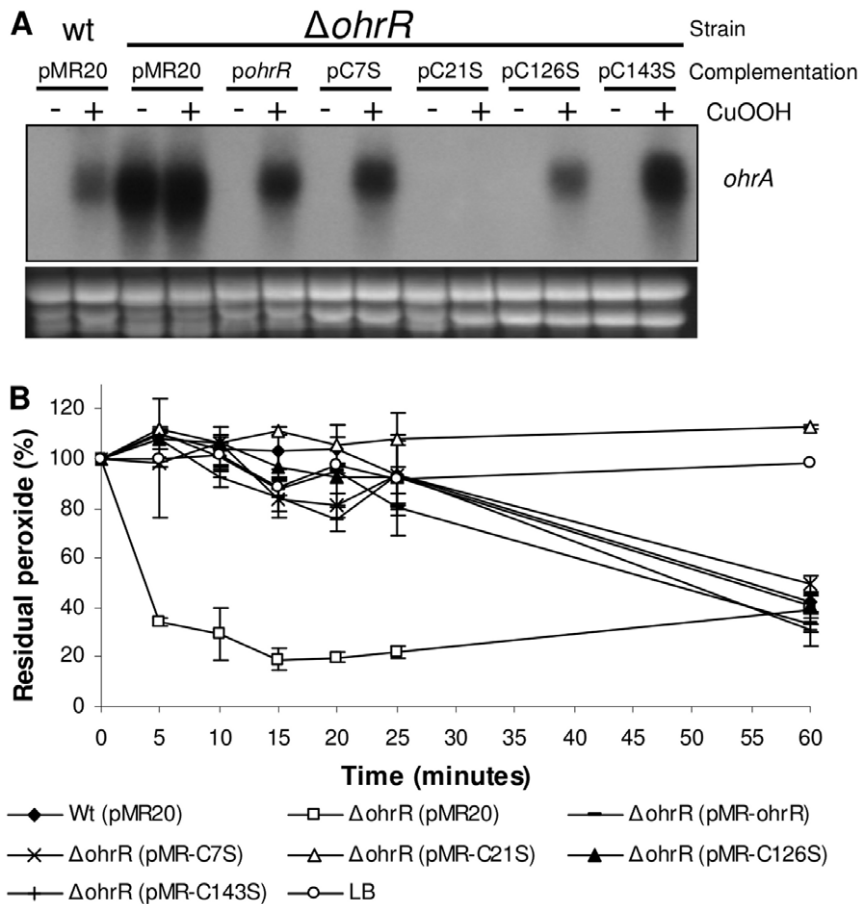

**Figure 9. The essential role of OhrR Cys21 in cumene hydroperoxide sensing *in vivo*.** (A) Cultures of wild type (ATCC 12472) and  $\Delta ohrR$  mutant strains containing empty vector (pMR20) or the  $\Delta ohrR$  mutant strain complemented with OhrR, OhrR C7S, OhrR C21S, OhrR C126S and OhrR C143S were either untreated or treated with 200  $\mu$ M cumene hydroperoxide (CuOOH). The expression of *ohrA* was monitored by Northern blot. Ethidium bromide staining of rRNA was used as a loading control. (B) Effect of OhrR cysteine mutations on the degradation of cumene hydroperoxide. Cultures of the indicated strains were grown in LB medium with 10  $\mu$ g/ml tetracycline. CuOOH (200  $\mu$ M) was then added, and the level of residual peroxide was determined using the xylenol orange assay.  
doi:10.1371/journal.pone.0047090.g009

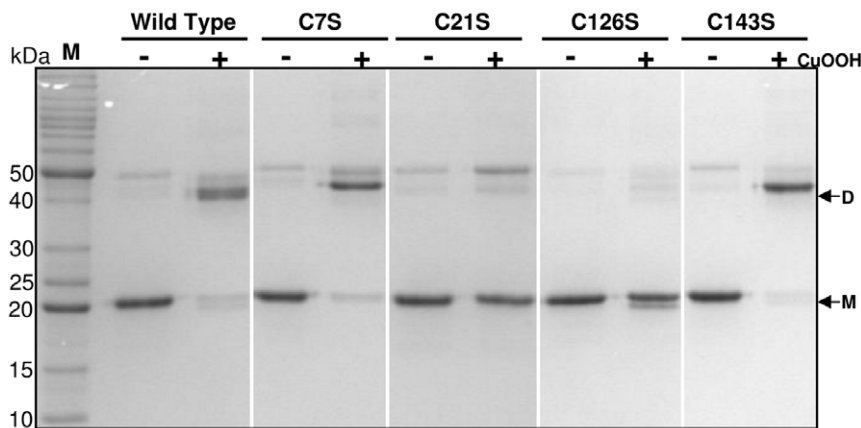

**Figure 10. Investigation of intermolecular disulfide bond formation on OhrR by nonreducing SDS-PAGE.** Purified OhrR variants were reduced by DTT treatment. Samples of reduced proteins were either untreated (–) or treated (+) with 100  $\mu$ M cumene hydroperoxide (CuOOH) for 30 min before alkylation. The NEM-alkylated proteins were separated by nonreducing SDS-PAGE, stained with Coomassie Brilliant Blue and subsequently destained. The monomeric (M) and dimeric (D) forms of OhrR are indicated by arrows. M represents the protein molecular mass standards.  
doi:10.1371/journal.pone.0047090.g010

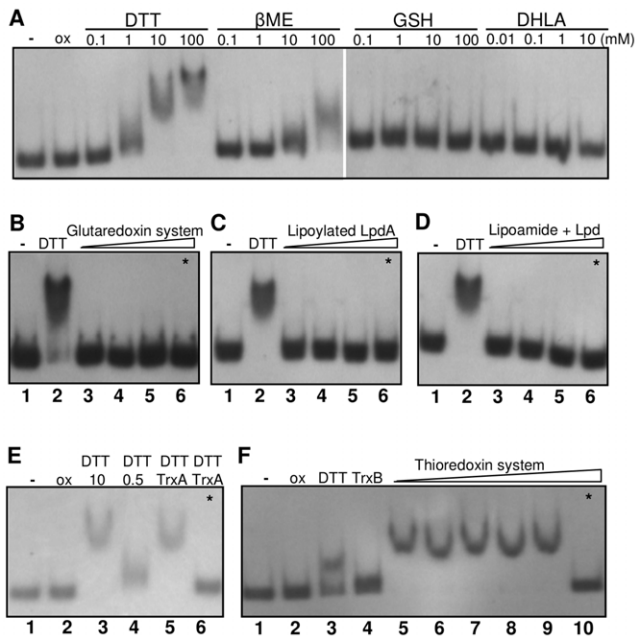

**Figure 11. Effect of thiol systems on OhrR reduction *in vitro*, as monitored by EMSA.** Samples of purified *C. violaceum* OhrR (5  $\mu$ M air-oxidized protein) were treated with the indicated reductants for 30 min at 30°C. All lanes contain the *ohrA* promoter region as a probe and 250 nM OhrR except lanes 1 (–), which contain the DNA probe only, or lanes 6 and 10 (\*), where OhrR was omitted in the reaction mixtures. (A) Oxidized OhrR (ox) treated with increasing concentrations of the low molecular weight thiols dithiothreitol (DTT),  $\beta$ -mercaptoethanol ( $\beta$ ME), reduced glutathione (GSH) and dihydrolipoic acid (DHLA). (B) Oxidized OhrR incubated with 0.5 mM NADPH, 10  $\mu$ g/ml glutathione reductase (GR), 10 mM glutathione (GSH) plus 1, 10 and 20  $\mu$ M glutaredoxin 3 (GrxC) (lanes 3–5). (C) Oxidized OhrR incubated with 0.5 mM NADH plus 1, 10 and 50  $\mu$ M LpdA (lanes 3–5). (D) Oxidized OhrR incubated with 0.5 mM NADH, 10  $\mu$ M lipamide plus 1, 5 and 10  $\mu$ M dihydrolipoamide dehydrogenase (Lpd) (lanes 3–5). Lanes 2 in panels B, C and D contain OhrR treated with 10 mM DTT (positive controls). (E) Oxidized OhrR (lane 2) was incubated with 10 mM DTT (lane 3), 0.5 mM DTT (lane 4), and 0.5 mM DTT plus 10  $\mu$ M thioredoxin (TrxA) (lane 5). (F) Samples of oxidized OhrR (lane 2) were incubated with 1 mM DTT (lane 3); 0.5 mM NADPH plus 5  $\mu$ M thioredoxin reductase (TrxB) (lane 4); 0.5 mM NADPH, 1  $\mu$ M TrxB plus 10, 20 and 40  $\mu$ M TrxA (lanes 5–7); 0.5 mM NADPH, 5  $\mu$ M TrxB plus 20 and 40  $\mu$ M TrxA (lanes 8–9). The control reactions without OhrR to confirm the absence of unspecific DNA binding by the enzymes (lanes 6 and 10, indicated by an asterisk) contain the same mixtures of the samples in lanes 5 and 9 of each respective panel.

doi:10.1371/journal.pone.0047090.g011

## Discussion

Reversible thiol oxidation plays a key role in controlling the activity of bacterial regulators that operate as direct thiol-based redox switches [11,47]. The inactivation pathways of OhrR regulators under organic hydroperoxide stress include both the formation of intermolecular disulfide bonds, as described for the 2-Cys OhrR in *X. campestris* [29] as well as the formation of mixed disulfides with LMW thiols, as reported for the 1-Cys OhrR in *B. subtilis* [27]. As more is learned about OhrR systems, the diversity of their mechanisms is revealed. Indeed, although the majority of OhrR proteins repress their target genes when bound to the cognate DNA, in the case of *S. coelicolor*, the reverse is observed for the corresponding protein bound to *ohrR* promoter [15]. Therefore, our description of the mechanism by which the OhrR/OhrA proteins from *C. violaceum* sense and respond to organic hydroper-

oxide insults contributes to our understanding of this system as a whole.

Except under harsh oxidative conditions that result in irreversible overoxidation [48], OhrR proteins appear to function as reversible regulators, a required feature for a biological redox switch. Therefore, it is reasonable to propose that bacteria have unidentified pathways for the regeneration of active OhrR by thiol-disulfide exchange reactions. In the present work, we have presented evidence that thioredoxin is a natural reducing system for OhrR in the human opportunistic pathogen *C. violaceum*. Additionally, our phenotypic, genetic and biochemical data indicate that OhrR/OhrA is the main dedicated system for the sensing and detoxification of organic hydroperoxides, at least under the conditions investigated here. These novel findings lead us to propose the following tentative model that combines transcriptional regulation and control of OhrR activity by disulfide bond formation with subsequent reduction via the thioredoxin system.

Under unstressed conditions, reduced OhrR binds to operator sites on *ohrA* and *ohrR* promoters with similar affinities (Figs. 6, 7, 8), repressing the transcription of both genes, probably by blocking the access of RNA polymerase because the OhrR-binding sites overlap the promoter elements (Fig. 5) and no transcription was observed under basal (reducing) conditions (Fig. 4). Exposure to organic hydroperoxide causes de-repression of both genes, but the *ohrA* monocistronic transcripts are much more abundant than the *ohrR* monocistronic transcripts or the bicistronic transcripts (Fig. 4). Based on the primer extension and Northern blot data, we propose that this distinct expression profile is a consequence of the differential strength of the *ohrA* and *ohrR* promoters (with individual transcription start sites) and also probably due to processing of the bicistronic transcripts. Despite minor differences, this hypothesis is in good agreement with the transcriptional regulation of *ohrR-ohr* in *X. campestris* [44] and *P. aeruginosa* [16] and is also consistent with the EMSA (Fig. 6) and DNase I footprinting assays (Fig. 7), which indicated that OhrR can bind to the two promoters. When considering that the *ohrR* transcription start site overlaps with the translation initiation codon (Fig. 5C), we suggest that the *ohrR* leaderless mRNA might be inefficiently translated, which is similar to the situation observed for the *ohrR* in *X. campestris* [45]. Together, these transcriptional and post-transcriptional features would result in a significantly higher production of OhrA compared to that of OhrR.

OhrR inactivation initially proceeds by Cys21 oxidation to a sulfenic acid (Cys-SOH), followed by a condensation reaction with Cys126-SH (Figs. 8 and 10), giving rise to an intermolecular disulfide, as described for the 2-Cys OhrR in *X. campestris* [29]. Although in *X. campestris* both cysteine residues are essential for redox sensing [29], our *in vitro* and *in vivo* analyses using OhrR proteins mutated at each cysteine residue indicated that Cys21 is critical for OhrR sensing (Figs. 8 and 9), while Cys126 appears to have a role in preventing overoxidation (Fig. 10), which is similar to the *P. aeruginosa* OhrR [16]. This is because in non-reducing SDS-PAGE, OhrR intermolecular disulfide is expected to migrate as a dimer; whereas reduced (-SH) and overoxidized forms (-SO<sub>2</sub>H<sup>+</sup>; -SO<sub>3</sub>H<sup>+</sup>) are expected to migrate as monomers. Finally, we determined that the oxidized OhrR is specifically reduced *in vitro* by thioredoxin (Fig. 11), suggesting that this reducing system could contribute to the regeneration of the reduced state of the OhrR, thereby shutting off the response. Consistent with this interpretation, the expression of *ohrA* and *ohrR* in *C. violaceum* (Fig. 4C) and in *S. coelicolor* [15] displayed rapid induction kinetics after *tert*-butyl exposure and returned to basal levels a few min later. Moreover, it has been described in *Agrobacterium tumefaciens*

**Table 1.** Bacterial strains and plasmids used in this work.

| Strain or plasmid          | Description                                                           | Reference or source |
|----------------------------|-----------------------------------------------------------------------|---------------------|
| <b><i>E. coli</i></b>      |                                                                       |                     |
| DH5 $\alpha$               | <i>E. coli</i> strain for cloning purposes                            | [56]                |
| S17-1                      | <i>E. coli</i> strain for plasmid mobilization                        | [57]                |
| BL21 (DE3)                 | <i>E. coli</i> strain for protein expression                          | Novagen             |
| AD494(DE3)                 | <i>E. coli</i> strain for protein expression                          | Novagen             |
| <b><i>C. violaceum</i></b> |                                                                       |                     |
| ATCC 12472                 | Wild type strain with sequenced genome                                | [39]                |
| JF0209                     | ATCC 12472 $\Delta$ ohrA, deletion mutant                             | This study          |
| JF0210                     | ATCC 12472 $\Delta$ ohrR, deletion mutant                             | This study          |
| <b>Plasmids</b>            |                                                                       |                     |
| pGEM-T Easy                | Cloning vector, Amp <sup>r</sup>                                      | Promega             |
| pProEX HTa                 | Overexpression vector, Amp <sup>r</sup>                               | Invitrogen          |
| pNPTS138                   | Suicide vector, containing <i>oriT</i> <i>sacB</i> , Kan <sup>r</sup> | D. Alley            |
| pMR20                      | Broad-host-range low copy vector, Tet <sup>r</sup>                    | [58]                |
| pET15b- <i>lpd</i>         | <i>lpd</i> coding region cloned in pET15b                             | [23]                |
| pET15b- <i>lpdA</i>        | <i>lpdA</i> coding region cloned in pET15b                            | [23]                |
| pET15b- <i>grxC</i>        | <i>grxC</i> coding region cloned in pET15b                            | A.Y.S. Sakugawa     |
| pPROEX-ohrR                | ohrR coding region cloned in pProEX HTa                               | This study          |
| pPROEX-C7S                 | ohrR <sub>C7S</sub> coding region in pProEX HTa                       | This study          |
| pPROEX-C21S                | ohrR <sub>C21S</sub> coding region in pProEX HTa                      | This study          |
| pPROEX-C126S               | ohrR <sub>C126S</sub> coding region in pProEX HTa                     | This study          |
| pPROEX-C143S               | ohrR <sub>C143S</sub> coding region in pProEX HTa                     | This study          |
| pMR-ohrA                   | pMR20 containing the entire ohrA gene                                 | This study          |
| pMR-ohrR                   | pMR20 containing the entire ohrR gene                                 | This study          |
| pMR-C7S                    | pMR20 containing the entire ohrR <sub>C7S</sub>                       | This study          |
| pMR-C21S                   | pMR20 containing the entire ohrR <sub>C21S</sub>                      | This study          |
| pMR-C126S                  | pMR20 containing the entire ohrR <sub>C126S</sub>                     | This study          |
| pMR-C143S                  | pMR20 containing the entire ohrR <sub>C143S</sub>                     | This study          |
| pNPT $\Delta$ ohrA         | ohrA flanking regions cloned in pNPTS138                              | This study          |
| pNPT $\Delta$ ohrR         | ohrR flanking regions cloned in pNPTS138                              | This study          |

doi:10.1371/journal.pone.0047090.t001

that the expression of *trx4*, a gene encoding for thioredoxin, is induced by organic hydroperoxide [49].

Although we can not exclude the existence of other reducing pathways for OhrR, the thioredoxin system appears to be quite specific because neither the glutathione/glutaredoxin system nor lipoylated enzymes used here were able to reduce OhrR *in vitro* (Fig. 11). Inspection of the *C. violaceum* genome sequence allowed for the detection of genes encoding for the proteins for all three reducing systems. In particular, with respect to the thioredoxin system, we found three probable thioredoxins (CV1584, CV1106 and CV1895) and one thioredoxin reductase (CV2813). The heterologous *E. coli* thioredoxin system that we used here for OhrR reduction *in vitro* appears to be appropriate when considering that the *C. violaceum* TrxA (CV1584) and TrxB (CV2813) proteins share 74% and 68% amino acid identities with their corresponding proteins in *E. coli*. Whether the thioredoxin system is able to reduce OhrR *in vivo* remains an interesting open question. Curiously, it has recently been described that enzymes of the Ohr/OsmC family, such as the Ohr of *X. fastidiosa*, OsmC of *E. coli* [23] and Ohr of *M. smegmatis* [50], are specifically reduced by lipoylated proteins, suggesting that although belonging to the same

route of organic hydroperoxide detoxification, OhrR and Ohr employ different cellular reducing pathways. Interestingly, OxyR (a well-established hydrogen peroxide sensor) is specifically reduced by glutaredoxin, another thiol-reducing enzyme [30], which probably reflects distinct response pathways for hydrogen and organic hydroperoxides. The specificity of redox signaling pathways is a theme that is receiving growing attention in both bacteria and eukaryotes [51–53].

In contrast with the well-established role of Ohr proteins in organic hydroperoxide defense under *in vitro* conditions, little is known about the contribution of this system in bacterial pathogenicity. Although previous work has determined that the *ohr* gene is induced *in vivo* during the *Actinobacillus pleuropneumoniae* infection of pigs [54], it was only very recently that Ohr was implicated as a critical virulence determinant required for the intracellular pathogen *Francisella tularensis* to infect macrophages and mice [55]. In *P. aeruginosa*, OhrR, but not Ohr, contributes to virulence in a *Caenorhabditis elegans* pathogenicity model [16]. The fact that *C. violaceum* is an opportunistic pathogen combined with the recent establishment of pathogenicity models in *C. elegans* [37], mouse and several mammalian cell lines [38] raises the perspective

for future investigations to determine whether OhrA and OhrR contribute to virulence in *C. violaceum*.

In summary, in this work we provide evidence that: (i) OhrA/OhrR is the major pathway involved in the reduction of organic hydroperoxides in *C. violaceum*; (ii) Cys21 is the reactive cysteine, whereas Cys126 is the resolving cysteine of OhrR; (iii) oxidation of OhrR by organic hydroperoxides causes its inactivation; and (iv) OhrR intermolecular disulfide is specifically reduced by thiorodoxin, regenerating this thiol-based regulator.

Materials and Methods

Bacterial strains and growth conditions

All bacterial strains and plasmids used in this study are listed in Table 1. *Chromobacterium violaceum* type strain ATCC 12472 was used as the wild type strain. *C. violaceum* was grown aerobically at 30°C in Luria-Bertani (LB) medium. Plasmids were introduced into *C. violaceum* by conjugation with *Escherichia coli* strain S17-1. *E. coli* was grown at 37°C in LB medium. When necessary, antibiotics were used at the following concentrations: ampicillin (100 µg ml<sup>-1</sup>), kanamycin (50 µg ml<sup>-1</sup>) and tetracycline (10 µg ml<sup>-1</sup>). The sequences of all DNA oligonucleotide primers are listed in Table 2.

Synthesis of linoleic acid and oleic acid hydroperoxides

Linoleic acid hydroperoxide (LaOOH) and oleic acid hydroperoxide (OaOOH) were chemically synthesized by photooxidation of their respective fatty acids with singlet oxygen [59]. LaOOH and OaOOH were separated by silica gel column chromatography, and LaOOH was quantified by its UV absorbance (ε<sub>254 nm</sub> = 25 × 10<sup>3</sup> M<sup>-1</sup> cm<sup>-1</sup>), considering that 60% of the hydroperoxides contain conjugated diene. The OaOOH concentration was determined by iodometry.

Construction and complementation of *ohrA* and *ohrR* mutant strains

*C. violaceum* deletion mutant strains were constructed by allelic exchange using a two-step selection procedure and the suicide vector pNPTS138, as previously described [60]. Briefly, two fragments containing regions upstream and downstream of the *ohrA* and *ohrR* genes were PCR-amplified, cloned into the vector pGEM-T Easy, sequenced and subcloned sequentially into the vector pNPTS138. The primers used for *ohrA* were CV0209-del1/CV0209-del2 and CV0209-del3/CV0209-del4, and those used for *ohrR* were CV0210-del1/CV0210-del2 and CV0210-del3/CV0210-del4. The resulting target vectors, pNPTΔ*ohrA* and pNPTΔ*ohrR*, were transferred to *C. violaceum* ATCC 12472 by conjugation. The transconjugants were selected on LB agar medium containing ampicillin (100 µg ml<sup>-1</sup>) and kanamycin (50 µg ml<sup>-1</sup>). The integrants were further screened by growth on LB agar plates containing 10% sucrose. The mutant strains Δ*ohrA* and Δ*ohrR* were confirmed by PCR and designated JF0209 and JF0210, respectively. For complementation of the Δ*ohrA* mutant, a DNA fragment containing the entire *ohrA* gene (680 bp) was PCR-amplified using the primers pCV0209-Fw/CV0209CP-Rv, cloned into pGEM-T Easy, and then moved into pMR20, generating the plasmid pMR-*ohrA*. Similarly, for complementation of the Δ*ohrR* mutant, a DNA fragment containing the full *ohrR* gene (726 bp) was PCR-amplified using the primers pCV0210-Fw/pC0209-Rv, cloned into pGEM-T Easy, and subcloned into pMR20 using *Bam*HI and *Hind*III, resulting in the plasmid pMR-*ohrR*. These constructs were introduced into mutant strains by conjugation, and transconjugants were selected in LB agar

Table 2. Primers used in this study.

| Primers      | Sequence (5' to 3') <sup>a</sup>     |
|--------------|--------------------------------------|
| CV0209-del1  | TGGGCCCCCTCGTCTGCAACGATTTCGC         |
| CV0209-del2  | TGGATCCCAGAGGGTTCATCTGGCTCTC         |
| CV0209-del3  | TGGATCCGCGTAATCGGGCGTACGAATG         |
| CV0209-del4  | TGAATTCCTGTTCAATGGACGGTGTGG          |
| CV0210-del1  | TGGGCCCCCTTCAACGATTGCGGGCCGGA        |
| CV0210-del2  | TGGATCCCAGGGGCGACGTTGTTTCTGT         |
| CV0210-del3  | TGGATCCTGAACCCGTAGGGTTTGATAG         |
| CV0210-del4  | TGAATTCGACGAGTTCGTGATCTGATG          |
| CV0210Exp-Fw | TGAATTCATGGAACAAGAAAACAGTGCCCG       |
| CV0210Exp-Rv | TAAGCTTCATTGCAGCAGCCGGTCGCGC         |
| pCV0209-Fw   | TGGATCCGCGGAGCGGAATGCAACT            |
| pCV0209-Rv   | TAAGCTTCGGTGGCTTCGGCGGTATAC          |
| pCV0210-Fw   | TGGATCCCTCGTGGCCGATCTGGGAC           |
| pCV0210-Rv   | TAAGCTTGGCGGAATACAGCGCGAAGC          |
| pCV2493-Fw   | TGAATTCATCCGTGACGCCGACAGG            |
| pCV2493-Rv   | TAAGCTTACGGTGGCTGGGTCCGGTA           |
| CV0209NB-Fw  | TGCAGGTGAAGTTGAGCACCCC               |
| CV0209NB-Rv  | CCGATGAAGCAGGCGGAATAGCC              |
| CV0210NB-Fw  | GGCTGTACCTCGACTCGCGGAC               |
| CV0210NB-Rv  | CTCGGTACGCCGACACAATCACC              |
| CV2493NB-Fw  | GTTACGCCGCTGCTTTCTCGG                |
| CV2493NB-Rv  | CGCTGGGAAGGGTGCCGATTC                |
| CV0209CP-Rv  | TAAGCTTAATCGTGATTAGGCCTCGCCG         |
| OhrRC7S-Fw   | GGAACAAGAAAACACGAGCCCGCCGACGACGCG    |
| OhrRC7S-Rv   | GCGCGTCTCGCGCGGGCTCGTGTTCCTGTTC      |
| OhrRC21S-Fw  | GGCTGGACCAGCAACTCAGCTTCGCGCTGTATTCC  |
| OhrRC21S-Rv  | GGAATACAGCGCGAAGCTGAGTTGCTGGTCCAGCC  |
| OhrRC126S-Fw | CCGCTGCAATTGTTAGCCGGAGCGGAATGCAACTG  |
| OhrRC126S-Rv | CAGTTGCATTCCGCTCCGGCTCAACAATTGCAGCGG |
| OhrRC143S-Fw | GATTGAGGCAGTCGCTGAGCGATCTGCGCGACCGG  |
| OhrRC143S-Rv | CCGGTCGCGCAGATCGCTCAGCGACTGCCTCAATC  |

<sup>a</sup>Underlined letters indicate the restriction enzyme recognition sites, used for cloning purposes.  
doi:10.1371/journal.pone.0047090.t002

medium containing ampicillin (100 µg ml<sup>-1</sup>) and tetracycline (10 µg ml<sup>-1</sup>).

Growth curves

Bacterial cells were grown overnight in LB medium and then diluted to an optical density at 600 nm (OD<sub>600</sub>) of 0.01 in 50 ml of LB medium. Cultures grown until midlog phase during 4 h (OD<sub>600</sub> ~0.4) were divided and either untreated or treated with 140 µM *tert*-butyl hydroperoxide, 60 µM cumene hydroperoxide or 75 µM H<sub>2</sub>O<sub>2</sub>. Aliquots of either untreated or treated cultures were collected at several time intervals, and the growth of strains was evaluated by measurement of optical density at 600 nm.

Site-directed mutagenesis of OhrR

The four cysteine residues of OhrR were replaced with serine by using the QuikChange II site-directed mutagenesis kit (Stratagene). The plasmid pPROEX-OhrR was used as a PCR template with the following complementary mutagenic primers: OhrRC7S-Fw/

OhrRC7S-Rv, OhrRC21S-Fw/OhrRC21S-Rv, OhrRC126S-Fw/OhrRC126S-Rv and OhrRC143S-Fw/OhrRC143S-Rv, resulting in four expression vectors with the corresponding mutated *ohrR* gene. To produce these four OhrR mutant proteins *in vivo*, the same complementary mutagenic primers were used, but the plasmid pGEM-OhrR was used as a PCR template. The obtained mutated OhrR genes were then cloned into pMR20 using *Bam*HI and *Hind*III, resulting in pMR-C7S, pMR-C21S, pMR-C126S and pMR-C143S, all of which were introduced into the *ohrR* mutant strain by conjugation. All mutations, generating single amino acid substitutions, were confirmed by DNA sequencing.

### Expression and purification of OhrR wild type and mutant proteins

The coding region of the *C. violaceum ohrR* gene (CV0210) was PCR amplified using primers CV0210Exp-Fw/CV0210Exp-Rv, and the 456-bp *Eco*RI/*Hind*III fragment was cloned into the vector pProEX HTa (Gibco BRL) to express an OhrR containing an N-terminal histidine tag. *E. coli* DH5 $\alpha$  was transformed with pProEX HTa vectors containing cloned genes encoding the wild type, C7S, C21S, C126S and C143S OhrR by electroporation. Recombinant proteins were induced with 1 mM isopropyl-D-thiogalactopyranoside (IPTG) from midlog *E. coli* cultures grown for 2 h at 37°C in LB media. The harvested cells were resuspended in purification buffer (50 mM sodium phosphate (pH 7.4), 300 mM NaCl, 50 mM imidazole) and lysed by sonication. The His-tagged proteins were then purified from the soluble fraction by NTA-resin affinity chromatography according to the manufacturer's recommendations (Qiagen). The degree of purification was verified by 14% sodium dodecyl sulfate-polyacrylamide gel electrophoresis (SDS-PAGE) under reducing conditions (100 mM DTT).

### Hydroperoxide degradation assay

Degradation of peroxides was measured using previously described methods [14,55], which were modified from the colorimetric ferrous oxidation-xylenol orange (FOX) assay [61]. Cultures grown in LB medium to an OD at 600 nm of 0.7 were divided and either treated with 300  $\mu$ M *tert*-butyl hydroperoxide and 200  $\mu$ M cumene hydroperoxide or 500  $\mu$ M H<sub>2</sub>O<sub>2</sub>. At 5-min intervals, 1 ml of the culture was collected, centrifuged and 100  $\mu$ l of the cleared supernatant was then added to 400  $\mu$ l of 25 mM sulfuric acid. Once all the samples were prepared, 500  $\mu$ l of freshly prepared iron-xylenol solution (100  $\mu$ M xylenol orange (Sigma), 2.5 mM ferrous sulfate heptahydrate (Sigma), 3.6 mM butylated hydroxytoluene (Sigma), and 25 mM sulfuric acid, prepared in a methanol:water (9:1) solution) were then added to the mixture. After 30 min of incubation at 37°C, the absorbance at 560 nm was determined. As a control, the levels of residual peroxides remaining in the LB medium were also determined.

### RNA isolation and Northern blot analysis

Exponential phase cultures (OD at 600 nm of 0.7) grown in LB medium were divided into flasks, and oxidants or other chemicals were added as described in the legends of the respective figures. After 15 min, untreated or treated cells were centrifuged at 10,000 *g* (4°C), and total RNA was isolated using the TRIzol reagent (Invitrogen) following the manufacturer's protocol. For Northern blot analyses, 15  $\mu$ g of each RNA sample was subjected to electrophoresis in a 1.5% formaldehyde gel and then transferred to a Hybond-N<sup>+</sup> membrane (Amersham Biosciences) by passive transfer capillary in 10 $\times$  SSC (1 $\times$  SSC is 0.15 M NaCl and 0.015 M sodium citrate) for 15 h. The probes, containing the internal regions of *ohrA* (103 bp), *ohrR* (119 bp) and *ohrB* (114 bp),

were PCR-amplified using the primers CV0209NB-Fw/CV0209NB-Rv, CV0210NB-Fw/CV0210NB-Rv and CV2493NB-Fw/CV2493NB-Rv, respectively. The probes were end labeled with T4 polynucleotide kinase (Fermentas) using [ $\gamma$ <sup>32</sup>P]-ATP. The membranes were pre-hybridized in 15 ml of ULTRAhyb (Ambion) at 42°C for 30 min and incubated with the labeled probes at 42°C for 3 h. The membranes were washed twice at 42°C for 5 min in 2 $\times$  SSC plus 0.1% SDS and twice at 42°C for 15 min in 0.1 $\times$  SSC plus 0.1% SDS. The results were detected by autoradiography.

### Primer extension assays

Total RNA samples, isolated as described above, were subjected to primer extension assays to determine transcription start sites using the primer pCV0209-Rv, specific to *ohrA*, and the primer pCV0210-Rv, specific to *ohrR*. Approximately one picomol of primers, end labeled with [ $\gamma$ <sup>32</sup>P]-ATP using T4 polynucleotide kinase (Fermentas), was hybridized to 10  $\mu$ g of total RNA for 2 h (58°C). The primers were extended with ImProm-II reverse transcriptase for 1 h (47°C), according to the manufacturer's recommendations (Promega). Extension products were phenol extracted, ethanol precipitated and run on a polyacrylamide sequencing gel alongside a sequencing ladder generated using the final DNA cycle sequencing system (Promega) and the promoter fragments as templates.

### Electrophoretic mobility shift assays (EMSAs)

DNA fragments covering the promoter regions of the *ohrA* (211 bp), *ohrR* (221 bp) and *ohrB* (253 bp) genes were obtained by PCR amplification using the primers pCV0209-Fw/pCV0209-Rv, pCV0210-Fw/pCV0210-Rv and pCV2493-Fw/pCV2493-Rv, respectively. DNA probes were end labeled with [ $\gamma$ <sup>32</sup>P]-ATP using T4 polynucleotide kinase (Fermentas), and the unincorporated nucleotides were removed using a Wizard SV PCR Clean-up system (Promega). DNA-binding reactions were performed in a mixture containing 20 mM Tris-HCl (pH 7.4), 50 mM KCl, 1 mM dithiothreitol (DTT), 1 mM EDTA, 5% glycerol, 0.05 mg/ml bovine serum albumin (BSA), 0.1 mg/ml competitor salmon sperm DNA, labeled DNA probes, and various amounts of OhrR proteins. The samples were incubated at 25°C for 25 min and loaded on a 5% polyacrylamide gel in 0.5 $\times$  Tris borate-EDTA buffer. The gel was dried and analyzed by autoradiography.

### Investigation of biological reducing systems for OhrR

The abilities of different reductants to reduce OhrR were tested using EMSA with the *ohrA* promoter region probe. Samples of air-oxidized OhrR (5  $\mu$ M) were incubated in 10  $\mu$ l of binding buffer (without DTT in this case) for 30 min at 30°C with the following treatments: 10, 20 and 40  $\mu$ M *E. coli* thioredoxin (TrxA), 1 and 5  $\mu$ M *E. coli* thioredoxin reductase (TrxB) and 0.5 mM NADPH for the thioredoxin system; 1, 10 and 20  $\mu$ M *X. fastidiosa* glutaredoxin 3 (GrxC), 10 mM glutathione (GSH), 10  $\mu$ g/ml *Saccharomyces cerevisiae* glutathione reductase (GR) and 0.5 mM NADPH for the glutathione/glutaredoxin system; 1, 10 and 50  $\mu$ M *X. fastidiosa* LpdA and 0.5 mM NADH; 10  $\mu$ M lipoamide, 1, 5 and 10  $\mu$ M *X. fastidiosa* dihydrolipoamide dehydrogenase (Lpd) and 0.5 mM NADH for the lipoamide system; and 1 and 10 mM DTT as positive controls. After treatments, all samples were diluted 20 times to obtain OhrR at 250 nM prior to analysis by EMSA. The disulfide reductase activities of the reducing systems were determined using the 5,5'-dithiobis-(2-nitrobenzoic acid) (DTNB) assay for thioredoxin and the lipoamide systems or the 2-hydroxyethyl disulfide (HED) assay for the glutaredoxin system, as previously described [23,62]. Lpd and LpdA recombi-

nant proteins (from *Xylella fastidiosa*) were expressed and purified as previously described [23]. TrxA (catalog no. T0910) and TrxB (catalog no. T7915) from *E. coli*, glutathione reductase from baker's yeast (catalog no. G3664), NADPH, NADH, GSH and lipamide were purchased from Sigma.

### DNase I footprinting

The same DNA fragments used for the EMSA assays, containing the *ohrA* and *ohrR* promoters, were PCR-amplified using only the reverse primers end-labeled. Binding reactions were performed as described in the EMSA assay without EDTA addition. DNase I treatment and gel electrophoresis were performed as previously described [60]. A sequence ladder was generated using the fmol DNA cycle sequencing system (Promega) and the promoter fragments as templates.

### Analysis of disulfide bond formation in OhrR by nonreducing SDS-PAGE

Wild type and C7S, C21S, C126S and C143S OhrR variants were reduced by incubating the purified proteins (28  $\mu$ M) in 100 mM of DTT for 2 h and desalted using PD-10 gel filtration columns (GE Healthcare). To obtain these proteins in the oxidized state, the reduced samples of OhrR (10  $\mu$ M) were treated with 100  $\mu$ M cumene hydroperoxide for 30 min. To prevent nonspecific disulfide bond formation, all samples were treated with 100 mM *N*-ethylmaleimide (NEM) for 2 h prior to analysis by 14% nonreducing SDS-PAGE.

### Supporting Information

**Figure S1 EMSA assay of OhrR with *ohrB*.** (A) Labeled probe containing the promoter region of *ohrB* was incubated with the indicated concentrations of purified OhrR. (B) Negative control: a probe of the *ohrR* coding region incubated with

increasing concentrations of purified OhrR protein (0 to 5000 nM). (TIF)

**Figure S2 Disulfide reductase activity of different reductive systems.** The activities of the thioredoxin system (A), LpdA (B) and Lpd (C) (lipamide systems) were determined by the DTNB assay. The reaction mixtures contain 50 mM sodium phosphate (pH 7.4), 1 mM diethylenetriamine pentaacetic acid (DTPA), 0.5 mM DTNB and 0.2 mM NAD(P)H. (A) Thioredoxin system: 0.1  $\mu$ M TrxB (diamond), 5  $\mu$ M TrxA (square) or 0.1  $\mu$ M TrxB plus 5  $\mu$ M TrxA (triangle). (B) Lipoylated enzyme LpdA (5  $\mu$ M) was added (triangle) or omitted as a control (square). (C) Lipamide system: 40  $\mu$ M lipamide (open diamond), 5  $\mu$ M Lpd (closed diamond) or 40  $\mu$ M lipamide plus 5  $\mu$ M Lpd (triangle). (D) The disulfide reductase activity of the glutaredoxin system was determined by the HED assay monitoring NADPH oxidation. Mixture reactions contain 20 mM Tris-Cl (pH 7.4), 0.1 mg/ml BSA, 0.7 mM HED, 0.2 mM NADPH, 1 mM glutathione, 10  $\mu$ g/ml glutathione reductase, and 5  $\mu$ M glutaredoxin 3 (GrxC) (triangle). As a control, GrxC was omitted from the assay mixture (diamond). (TIF)

### Acknowledgments

We are grateful to Andressa Y. Sakugawa (Instituto de Biociências – USP) for providing the *E. coli* strain expressing XfGrxC and to Thiago G.P. Alegria (Instituto de Biociências – USP) and Sayuri Miyamoto (Instituto de Química – USP) for providing the lipid hydroperoxide samples.

### Author Contributions

Conceived and designed the experiments: JFSN LESN. Performed the experiments: JFSN CCN. Analyzed the data: JFSN LESN. Wrote the paper: JFSN LESN. Obtained funding: LESN.

### References

1. Imlay JA (2008) Cellular defenses against superoxide and hydrogen peroxide. *Annu Rev Biochem* 77: 755–776.
2. Girotti AW (1998) Lipid hydroperoxide generation, turnover, and effector action in biological systems. *J Lipid Res* 39: 1529–1542.
3. Funk CD (2001) Prostaglandins and leukotrienes: advances in eicosanoid biology. *Science* 294: 1871–1875.
4. Gobel C, Feussner I, Rosahl S (2003) Lipid peroxidation during the hypersensitive response in potato in the absence of 9-lipoxygenases. *J Biol Chem* 278: 52834–52840.
5. Aliberti J, Bafica A (2005) Anti-inflammatory pathways as a host evasion mechanism for pathogens. *Prostaglandins Leukot Essent Fatty Acids* 73: 283–288.
6. Hanne HF, Refsgaard LT, Stadtman ER (2000) Modifications of proteins by polyunsaturated fatty acid peroxidation products. *Proc Natl Acad Sci USA* 97: 611–616.
7. Medeiros MH (2009) Exocyclic DNA adducts as biomarkers of lipid oxidation and predictors of disease. Challenges in developing sensitive and specific methods for clinical studies. *Chem Res Toxicol* 22: 419–425.
8. Jacobson FS, Morgan RW, Christman MF, Ames BN (1989) An alkyl hydroperoxide reductase from *Salmonella typhimurium* involved in the defense of DNA against oxidative damage. Purification and properties. *J Biol Chem* 264: 1488–1496.
9. Poole LB, Ellis HR (1996) Flavin-dependent alkyl hydroperoxide reductase from *Salmonella typhimurium*: Purification and enzymatic activities of overexpressed AhpF and AhpC proteins. *Biochemistry* 35: 56–64.
10. Seaver LC, Imlay JA (2001) Alkyl hydroperoxide reductase is the primary scavenger of endogenous hydrogen peroxide in *Escherichia coli*. *J Bacteriol* 183: 7173–7181.
11. Antelmann H, Helmman JD (2011) Thiol-based redox switches and gene regulation. *Antioxid Redox Signal* 14: 1049–1063.
12. Mongkolsuk S, Praituan W, Loprasert S, Fuangthong M, Chamnongpol S (1998) Identification and characterization of a new organic hydroperoxide resistance (*ohr*) gene with a novel pattern of oxidative stress regulation from *Xanthomonas campestris* pv. phaseoli. *J Bacteriol* 180: 2636–2643.
13. Fuangthong M, Atichartpongkul S, Mongkolsuk S, Helmman JD (2001) OhrR is a repressor of *ohrA*, a key organic hydroperoxide resistance determinant in *Bacillus subtilis*. *J Bacteriol* 183: 4134–4141.
14. Chuchue T, Tanboon W, Prapagdee B, Dubbs JM, Vattanaviboon P, et al. (2006) *ohrR* and *ohr* are the primary sensor/regulator and protective genes against organic hydroperoxide stress in *Agrobacterium tumefaciens*. *J Bacteriol* 188: 842–851.
15. Oh SY, Shin JH, Roe JH (2007) Dual role of OhrR as a repressor and an activator in response to organic hydroperoxides in *Streptomyces coelicolor*. *J Bacteriol* 189: 6284–6292.
16. Atichartpongkul S, Fuangthong M, Vattanaviboon P, Mongkolsuk S (2010) Analyses of the regulatory mechanism and physiological roles of *Pseudomonas aeruginosa* OhrR, a transcription regulator and a sensor of organic hydroperoxides. *J Bacteriol* 192: 2093–2101.
17. Lesniak J, Barton WA, Nikolov DB (2002) Structural and functional characterization of the *Pseudomonas* hydroperoxide resistance protein Ohr. *EMBO J* 21: 6649–6659.
18. Cussiol JRR, Alves SV, Oliveira MA, Netto LES (2003) Organic hydroperoxide resistance gene encodes a thiol-dependent peroxidase. *J Biol Chem* 278: 11570–11578.
19. Gutierrez C, Devedjian JC (1991) Osmotic induction of gene *asmC* expression in *Escherichia coli* K12. *J Mol Biol* 220: 959–973.
20. Lesniak J, Barton WA, Nikolov DB (2003) Structural and functional features of the *Escherichia coli* hydroperoxide resistance protein OsmC. *Protein Sci* 12: 2838–2843.
21. Oliveira MA, Guimarães BG, Cussiol JR, Medrano FJ, Gozzo FC, et al. (2006) Structural insights into enzyme-substrate interaction and characterization of enzymatic intermediates of organic hydroperoxide resistance protein from *Xylella fastidiosa*. *J Mol Biol* 359: 433–445.
22. Atichartpongkul S, Loprasert S, Vattanaviboon P, Whangsuk W, Helmman JD, et al. (2001) Bacterial Ohr and OsmC paralogues define two protein families with distinct functions and patterns of expression. *Microbiology* 147: 1775–1782.
23. Cussiol JRR, Alegria TGP, Szveda LI, Netto LES (2010) Ohr (organic hydroperoxide resistance protein) possesses a previously undescribed activity, lipoyl-dependent peroxidase. *J Biol Chem* 285: 21943–21950.

24. Hong M, Fuangthong M, Helmann JD, Brennan RG (2005) Structure of an OhrR-ohrA operator complex reveals the DNA binding mechanism of the MarR family. *Mol Cell* 20: 131–141.
25. Newberry KJ, Fuangthong M, Panmanee W, Mongkolsuk S, Brennan RG (2007) Structural mechanism of organic hydroperoxide induction of the transcription regulator OhrR. *Mol Cell* 28: 652–664.
26. Fuangthong M, Helmann JD (2002) The OhrR repressor senses organic hydroperoxides by reversible formation of a cysteine-sulfenic acid derivative. *Proc Natl Acad Sci USA* 99: 6690–6695.
27. Lee JW, Soonsanga S, Helmann JD (2007) A complex thiolate switch regulates the *Bacillus subtilis* organic peroxide sensor OhrR. *Proc Natl Acad Sci USA* 104: 8743–48.
28. Duarte V, Latour JM (2010) PerR vs OhrR: selective peroxide sensing in *Bacillus subtilis*. *Mol Biosyst* 6: 316–323.
29. Panmanee W, Vattanaviboon P, Poole LB, Mongkolsuk S (2006) Novel organic hydroperoxide-sensing and responding mechanisms for OhrR, a major bacterial sensor and regulator of organic hydroperoxide stress. *J Bacteriol* 188: 1389–1395.
30. Zheng M, Aslund F, Storz G (1998) Activation of the OxyR transcription factor by reversible disulfide bond formation. *Science* 279: 1718–1721.
31. Kang JG, Paget MS, Seok YJ, Hahn MY, Bac JB, et al. (1999) RsrA, an anti-sigma factor regulated by redox change. *EMBO J* 18: 4292–4298.
32. Park JH, Roe JH (2008) Mycothiol regulates and is regulated by a thiol-specific antisigma factor RsrA and  $\sigma^R$  in *Streptomyces coelicolor*. *Mol Microbiol* 68: 861–870.
33. Lima-Bittencourt CI, Astolfi-Filho S, Chartone-Souza E, Santos FR, Nascimento AMA (2007) Analysis of *Chromobacterium* sp. natural isolates from different Brazilian ecosystems. *BMC Microbiol* 7: 58.
34. Duran N, Menck CFM (2001) *Chromobacterium violaceum*: a review of pharmacological and industrial perspectives. *Crit Rev Microbiol* 27: 201–222.
35. Yang CH, Li YH (2011) *Chromobacterium violaceum* infection: a clinical review of an important but neglected infection. *J Chin Med Assoc* 74: 435–441.
36. Segal BH, Ding L, Holland SM (2003) Phagocyte NADPH oxidase, but not inducible nitric oxide synthase, is essential for early control of *Burkholderia cepacia* and *Chromobacterium violaceum* infection in mice. *Infect Immun* 71: 205–210.
37. Swem LR, Swem DL, O'Loughlin CT, Gatmaitan R, Zhao B, et al. (2009) A quorum-sensing antagonist targets both membrane-bound and cytoplasmic receptors and controls bacterial pathogenicity. *Mol Cell* 35: 143–153.
38. Miki T, Iguchi M, Akiba K, Hosono M, Sobue T, et al. (2010) *Chromobacterium* pathogenicity island 1 type III secretion system is a major virulence determinant for *Chromobacterium violaceum*-induced cell death in hepatocytes. *Mol Microbiol* 77: 855–872.
39. Vasconcelos AT, Almeida DF, Hungria M, Guimarães CT, Antônio RV, et al. (2003) The complete genome sequence of *Chromobacterium violaceum* reveals remarkable and exploitable bacterial adaptability. *Proc Natl Acad Sci USA* 100: 11660–11665.
40. Hungria M, Nicolas MF, Guimarães CT, Vasconcelos ATR (2004) Tolerance to stresses and environmental adaptability of *Chromobacterium violaceum*. *Gen Mol Res* 3: 102–116.
41. Finn RD, Mistry J, Tate J, Coghill P, Heger A, et al. (2010) The Pfam protein families database. *Nucleic Acids Res* 38: D211–222.
42. Shin DH, Choi IG, Busso D, Jancarik J, Yokota H, et al. (2004) Structure of OsmC from *Escherichia coli*: a salt-shock-induced protein. *Acta Crystallogr D Biol Crystallogr* 60: 903–911.
43. Konzen M, De Marco D, Cordova CA, Vieira TO, Antônio RV, et al. (2006) Antioxidant properties of violacein: possible relation on its biological function. *Bioorg Med Chem* 14: 8307–8313.
44. Sukchawalit R, Loprasert S, Atichartpongkul S, Mongkolsuk S (2001) Complex regulation of the organic hydroperoxide resistance gene (*ohr*) from *Xanthomonas* involves OhrR, a novel organic peroxide-inducible negative regulator, and posttranscriptional modifications. *J Bacteriol* 183: 4405–4412.
45. Mongkolsuk S, Panmanee W, Atichartpongkul S, Vattanaviboon P, Whangsuk W, et al. (2002) The repressor for an organic peroxide-inducible operon is uniquely regulated at multiple levels. *Mol Microbiol* 44: 793–802.
46. Panmanee W, Vattanaviboon P, Eiamphungporn W, Whangsuk W, Sallabhan R, et al. (2002) OhrR, a transcription repressor that senses and responds to changes in organic peroxide levels in *Xanthomonas campestris* pv. phaseoli. *Mol Microbiol* 45: 1647–1654.
47. Vázquez-Torres A (2012) Redox active thiol sensors of oxidative and nitrosative stress. *Antioxid Redox Signal* 00: In press.
48. Soonsanga S, Lee JW, Helmann JD (2008) Oxidant-dependent switching between reversible and sacrificial oxidation pathways for *Bacillus subtilis* OhrR. *Mol Microbiol* 68: 978–986.
49. Vattanaviboon P, Tanboon W, Mongkolsuk S (2007) Physiological and expression analyses of *Agrobacterium tumefaciens* *trxA*, encoding thioredoxin. *J Bacteriol* 189: 6477–6481.
50. Ta P, Buchmeier N, Newton GL, Rawat M, Fahey RC (2011) Organic hydroperoxide resistance protein and ergothioneine compensate for loss of mycothiol in *Mycobacterium smegmatis* mutants. *J Bacteriol* 193: 1981–1990.
51. Ritz D, Beckwith J (2001) Roles of thiol-redox pathways in bacteria. *Annu Rev Microbiol* 55: 21–48.
52. Jones DP (2006) Redefining oxidative stress. *Antioxid Redox Signal* 8: 1865–1879.
53. Meyer Y, Buchanan BB, Vignols F, Reichheld JP (2009) Thioredoxins and glutaredoxins: unifying elements in redox biology. *Annu Rev Genet* 43: 335–367.
54. Shea RJ, Mulks MH (2002) ohr, encoding an organic hydroperoxide reductase, is an in vivo-induced gene in *Actinobacillus pleuropneumoniae*. *Infect Immun* 70: 794–802.
55. Llewellyn AC, Jones CL, Napier BA, Bina JE, Weiss DS (2011) Macrophage replication screen identifies a novel *Francisella* hydroperoxide resistance protein involved in virulence. *PLoS One* 6: e24201.
56. Hanahan D (1983) Studies on transformation of *Escherichia coli* with plasmids. *J Mol Biol* 166: 557.
57. Simon R, Prieffer U, Puhler A (1983) A broad host range mobilization system for *in vivo* genetic engineering: transposon mutagenesis in Gram-negative bacteria. *Biotechnology* 1: 784–790.
58. Roberts RC, Toochinda C, Avedissian M, Baldini RL, Gomes SL, et al. (1996) Identification of a *Caulobacter crescentus* operon encoding *hrcA*, involved in negatively regulating heat-inducible transcription, and the chaperone gene *grpE*. *J Bacteriol* 178: 1829–1841.
59. Miyamoto S, Martinez GR, Martins AP, Medeiros MH, Di Mascio P (2003) Direct evidence of singlet molecular oxygen [ $O_2(^1\Delta_g)$ ] production in the reaction of linoleic acid hydroperoxide with peroxynitrite. *J Am Chem Soc* 125: 4510–4517.
60. da Silva Neto JF, Braz VS, Italiani VCS, Marques MV (2009) Fur controls iron homeostasis and oxidative stress defense in the oligotrophic alpha-proteobacterium *Caulobacter crescentus*. *Nucleic Acids Res* 37: 4812–4825.
61. Jiang ZY, Hunt JV, Wolff SP (1992) Ferrous ion oxidation in the presence of xylenol orange for detection of lipid hydroperoxide in low density lipoprotein. *Anal Biochem* 202: 384–389.
62. Discola KF, de Oliveira MA, Cussiol JRR, Monteiro G, Bárcena JA, et al. (2009) Structural aspects of the distinct biochemical properties of glutaredoxin 1 and glutaredoxin 2 from *Saccharomyces cerevisiae*. *J Mol Biol* 385: 889–901.
